# Supplementary material
Source: Research Square preprint supplement (doi:10.21203/rs.3.rs-9200629/v1)

**Figure 1D.** Western blot detected the protein levels of mGluR5 in the cortex of 7-month-old WT mice and 7-11 months 3×Tg-AD mice.

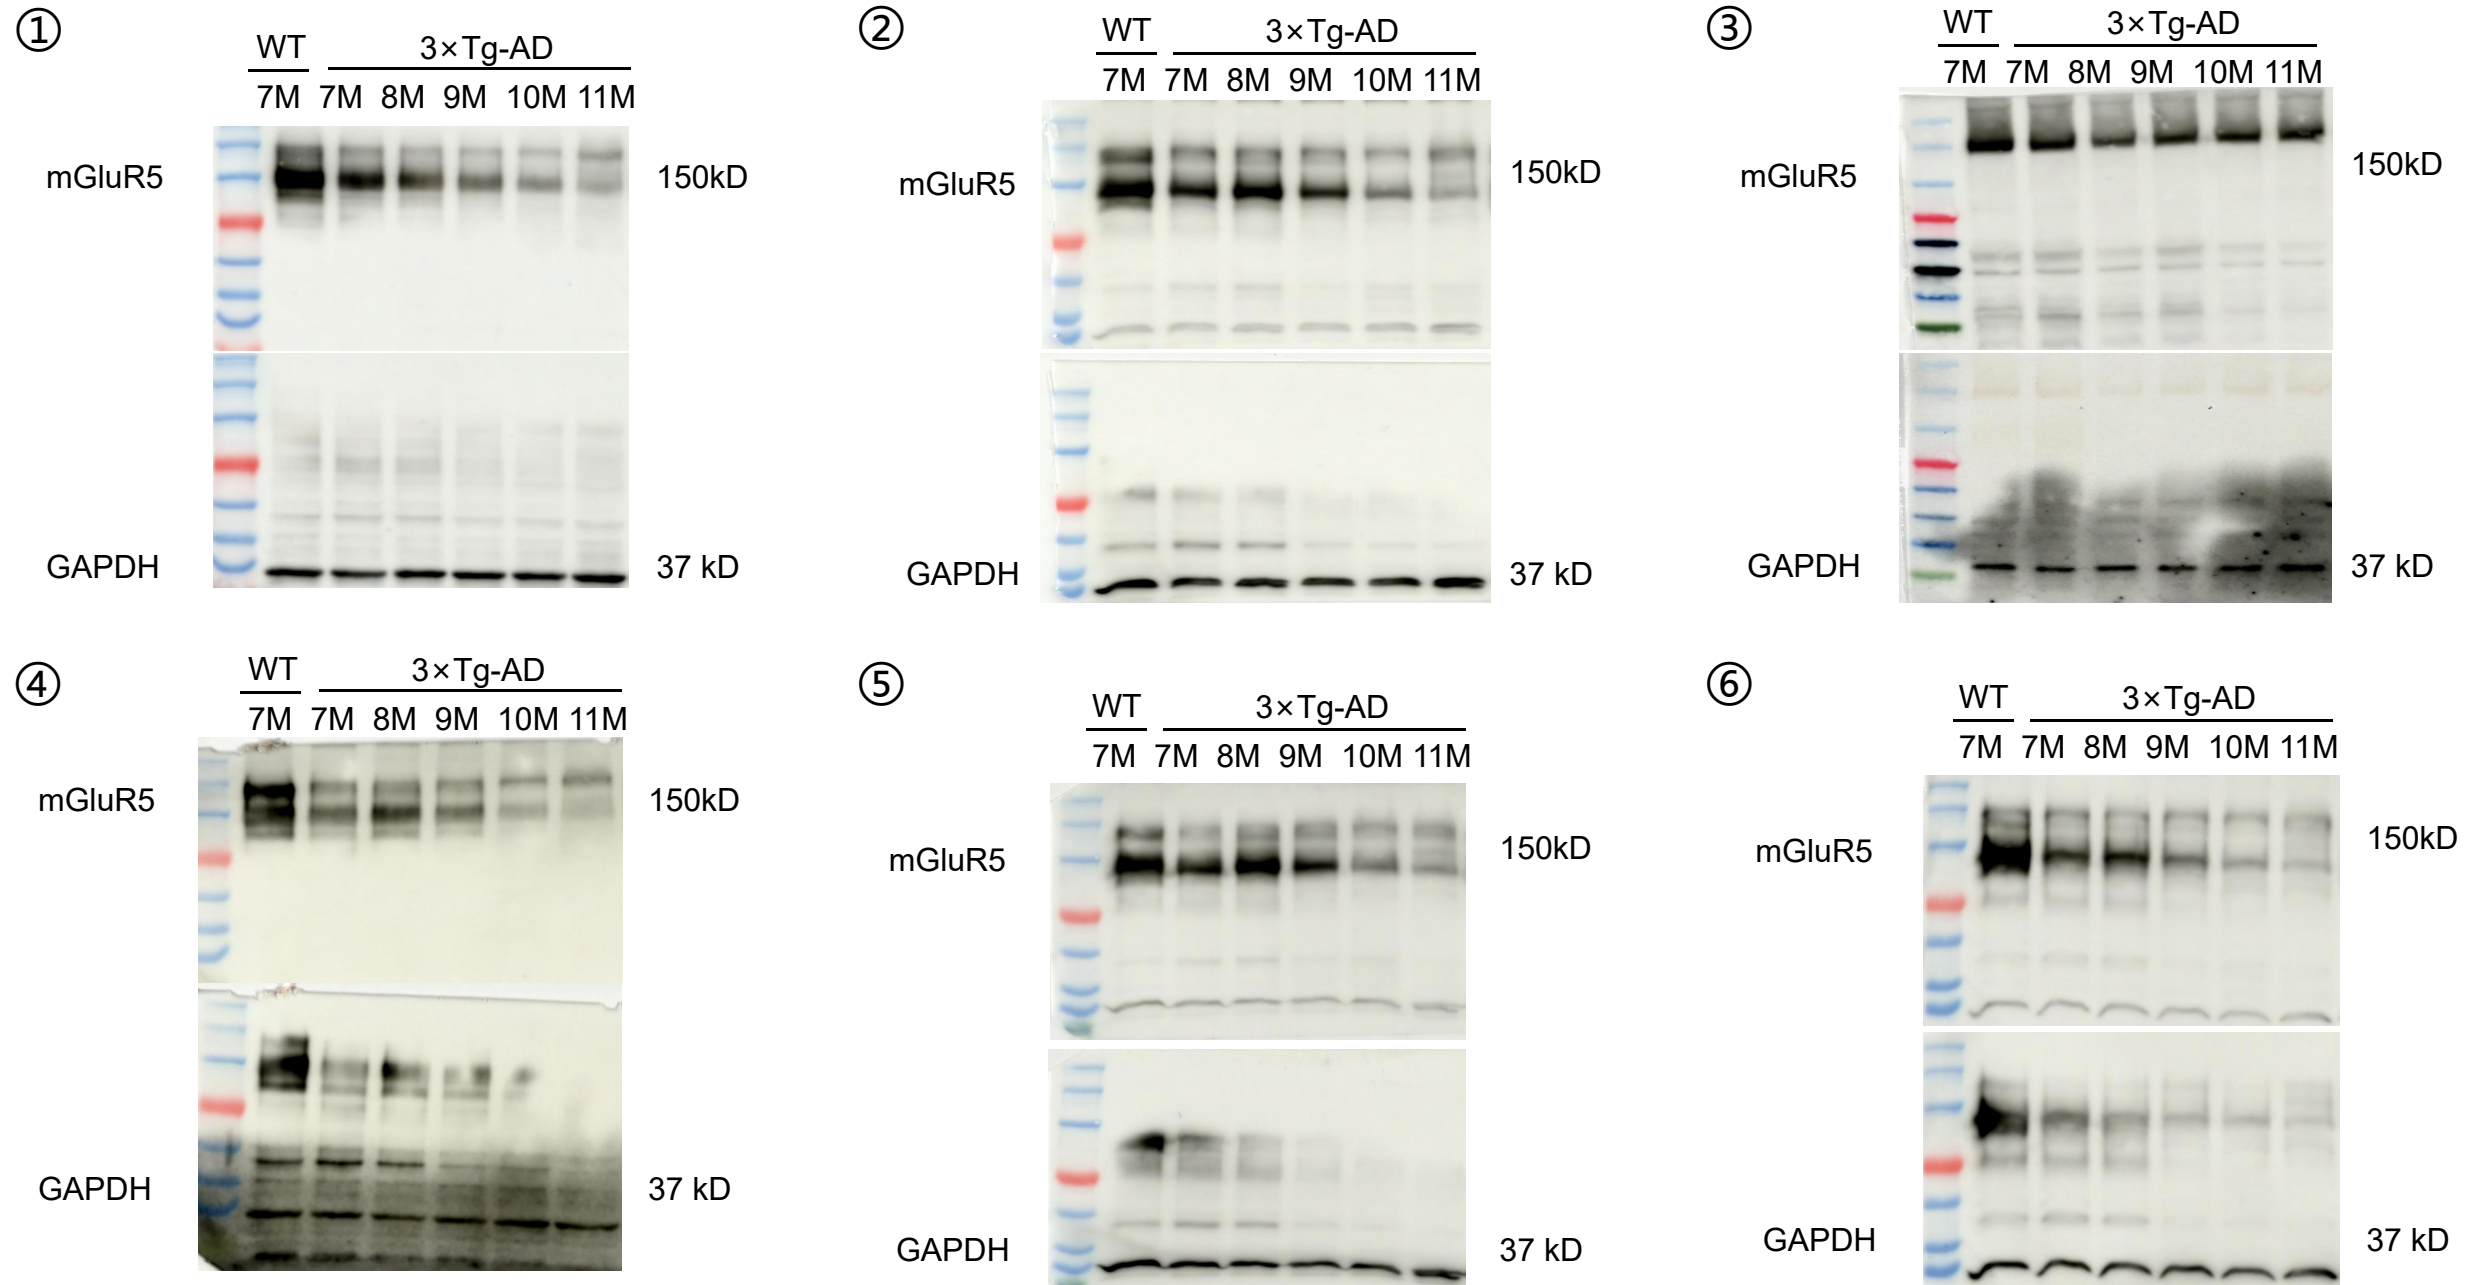

**Figure 1E.** Western blot detected the protein levels of mGluR5 in the hippocampus of 7-month-old WT mice and 7-11 months 3×Tg-AD mice.

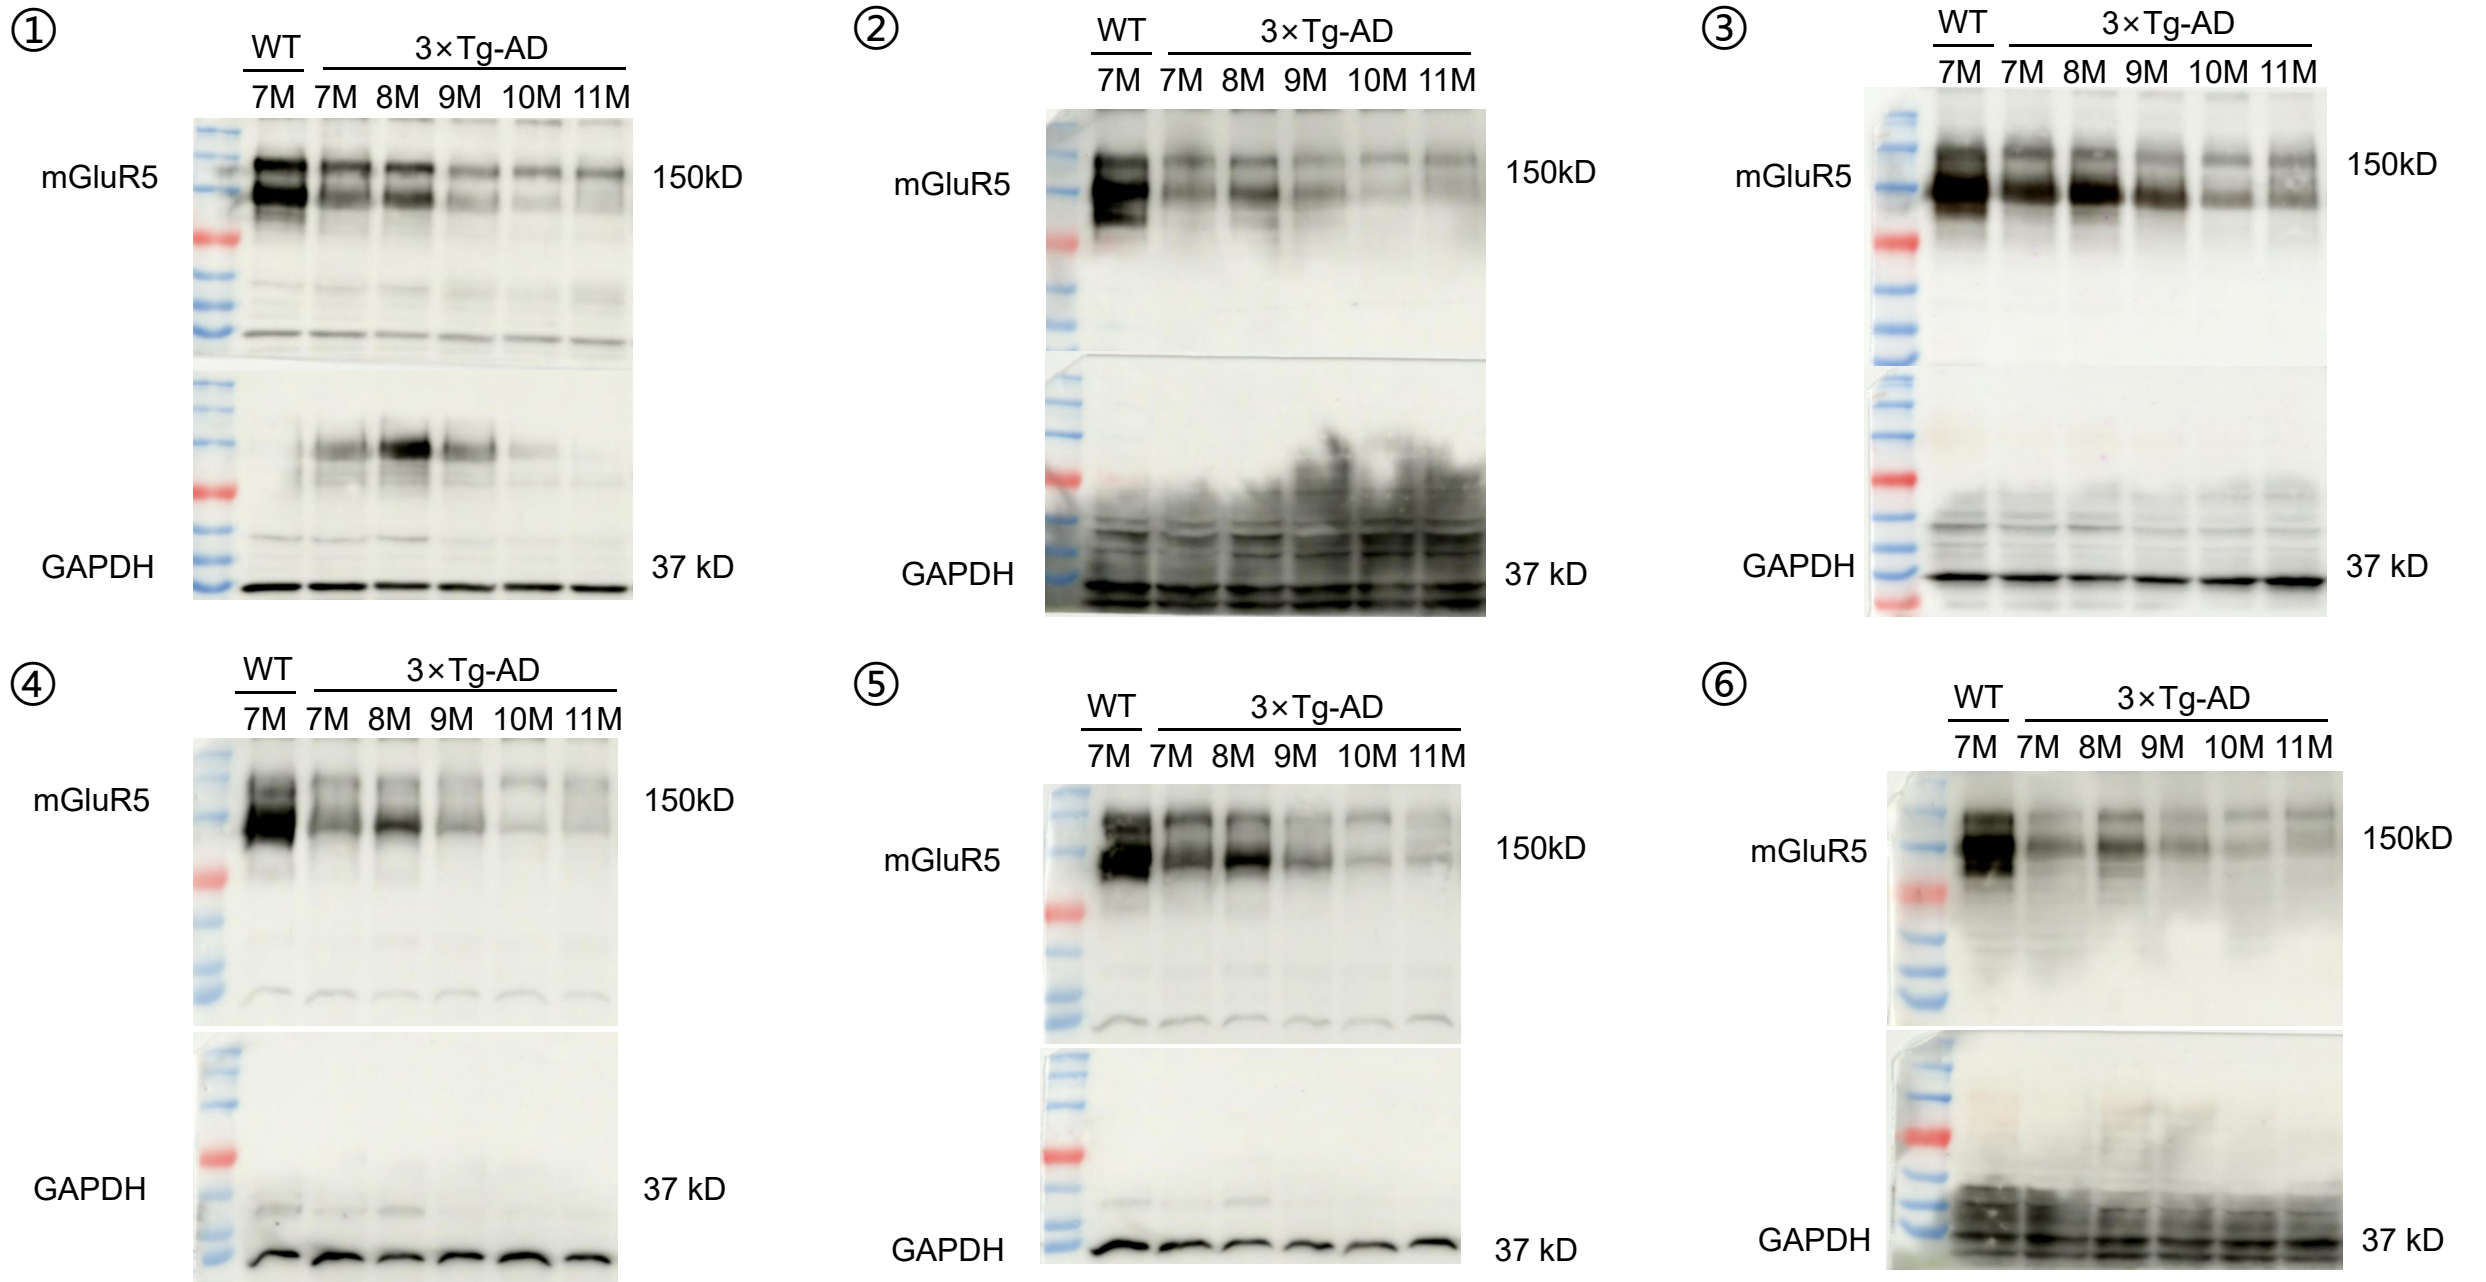

**Figure2B.** CETSA detected the directly interaction between FA and mGluR5 in BV2 cells.

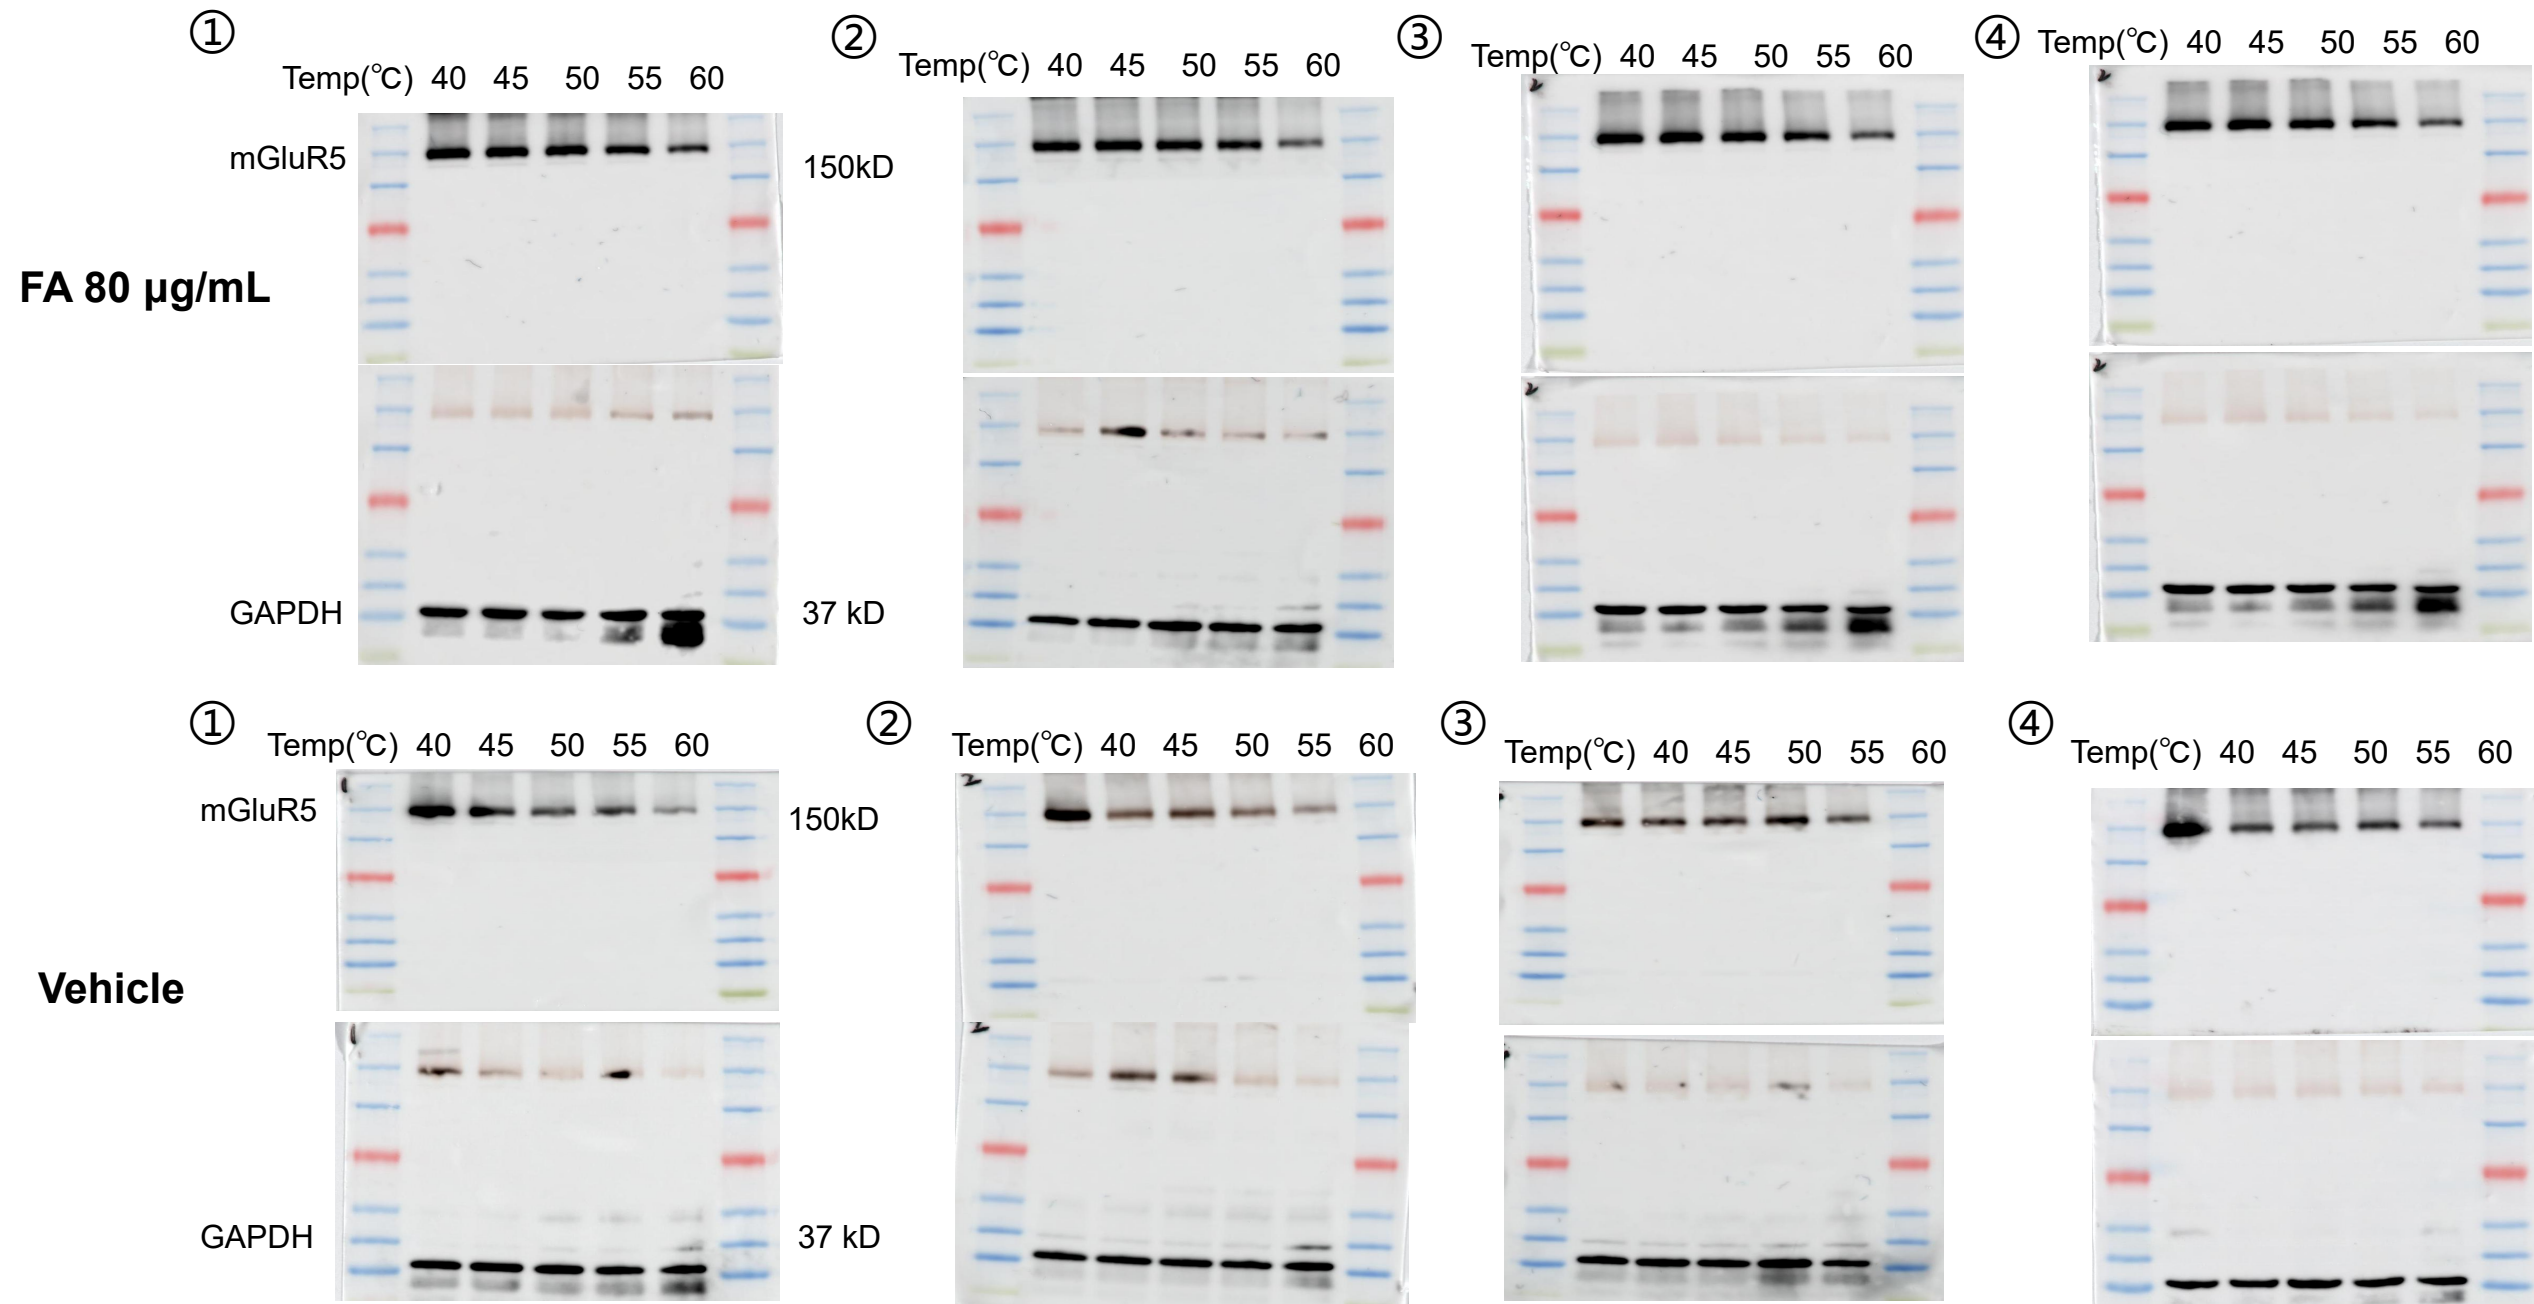

**Figure 6A.** Western blot detected the protein levels of mGluR5, iNOS, p-CaMK II and p-NF- $\kappa$ B in the cortex after FA treatment.

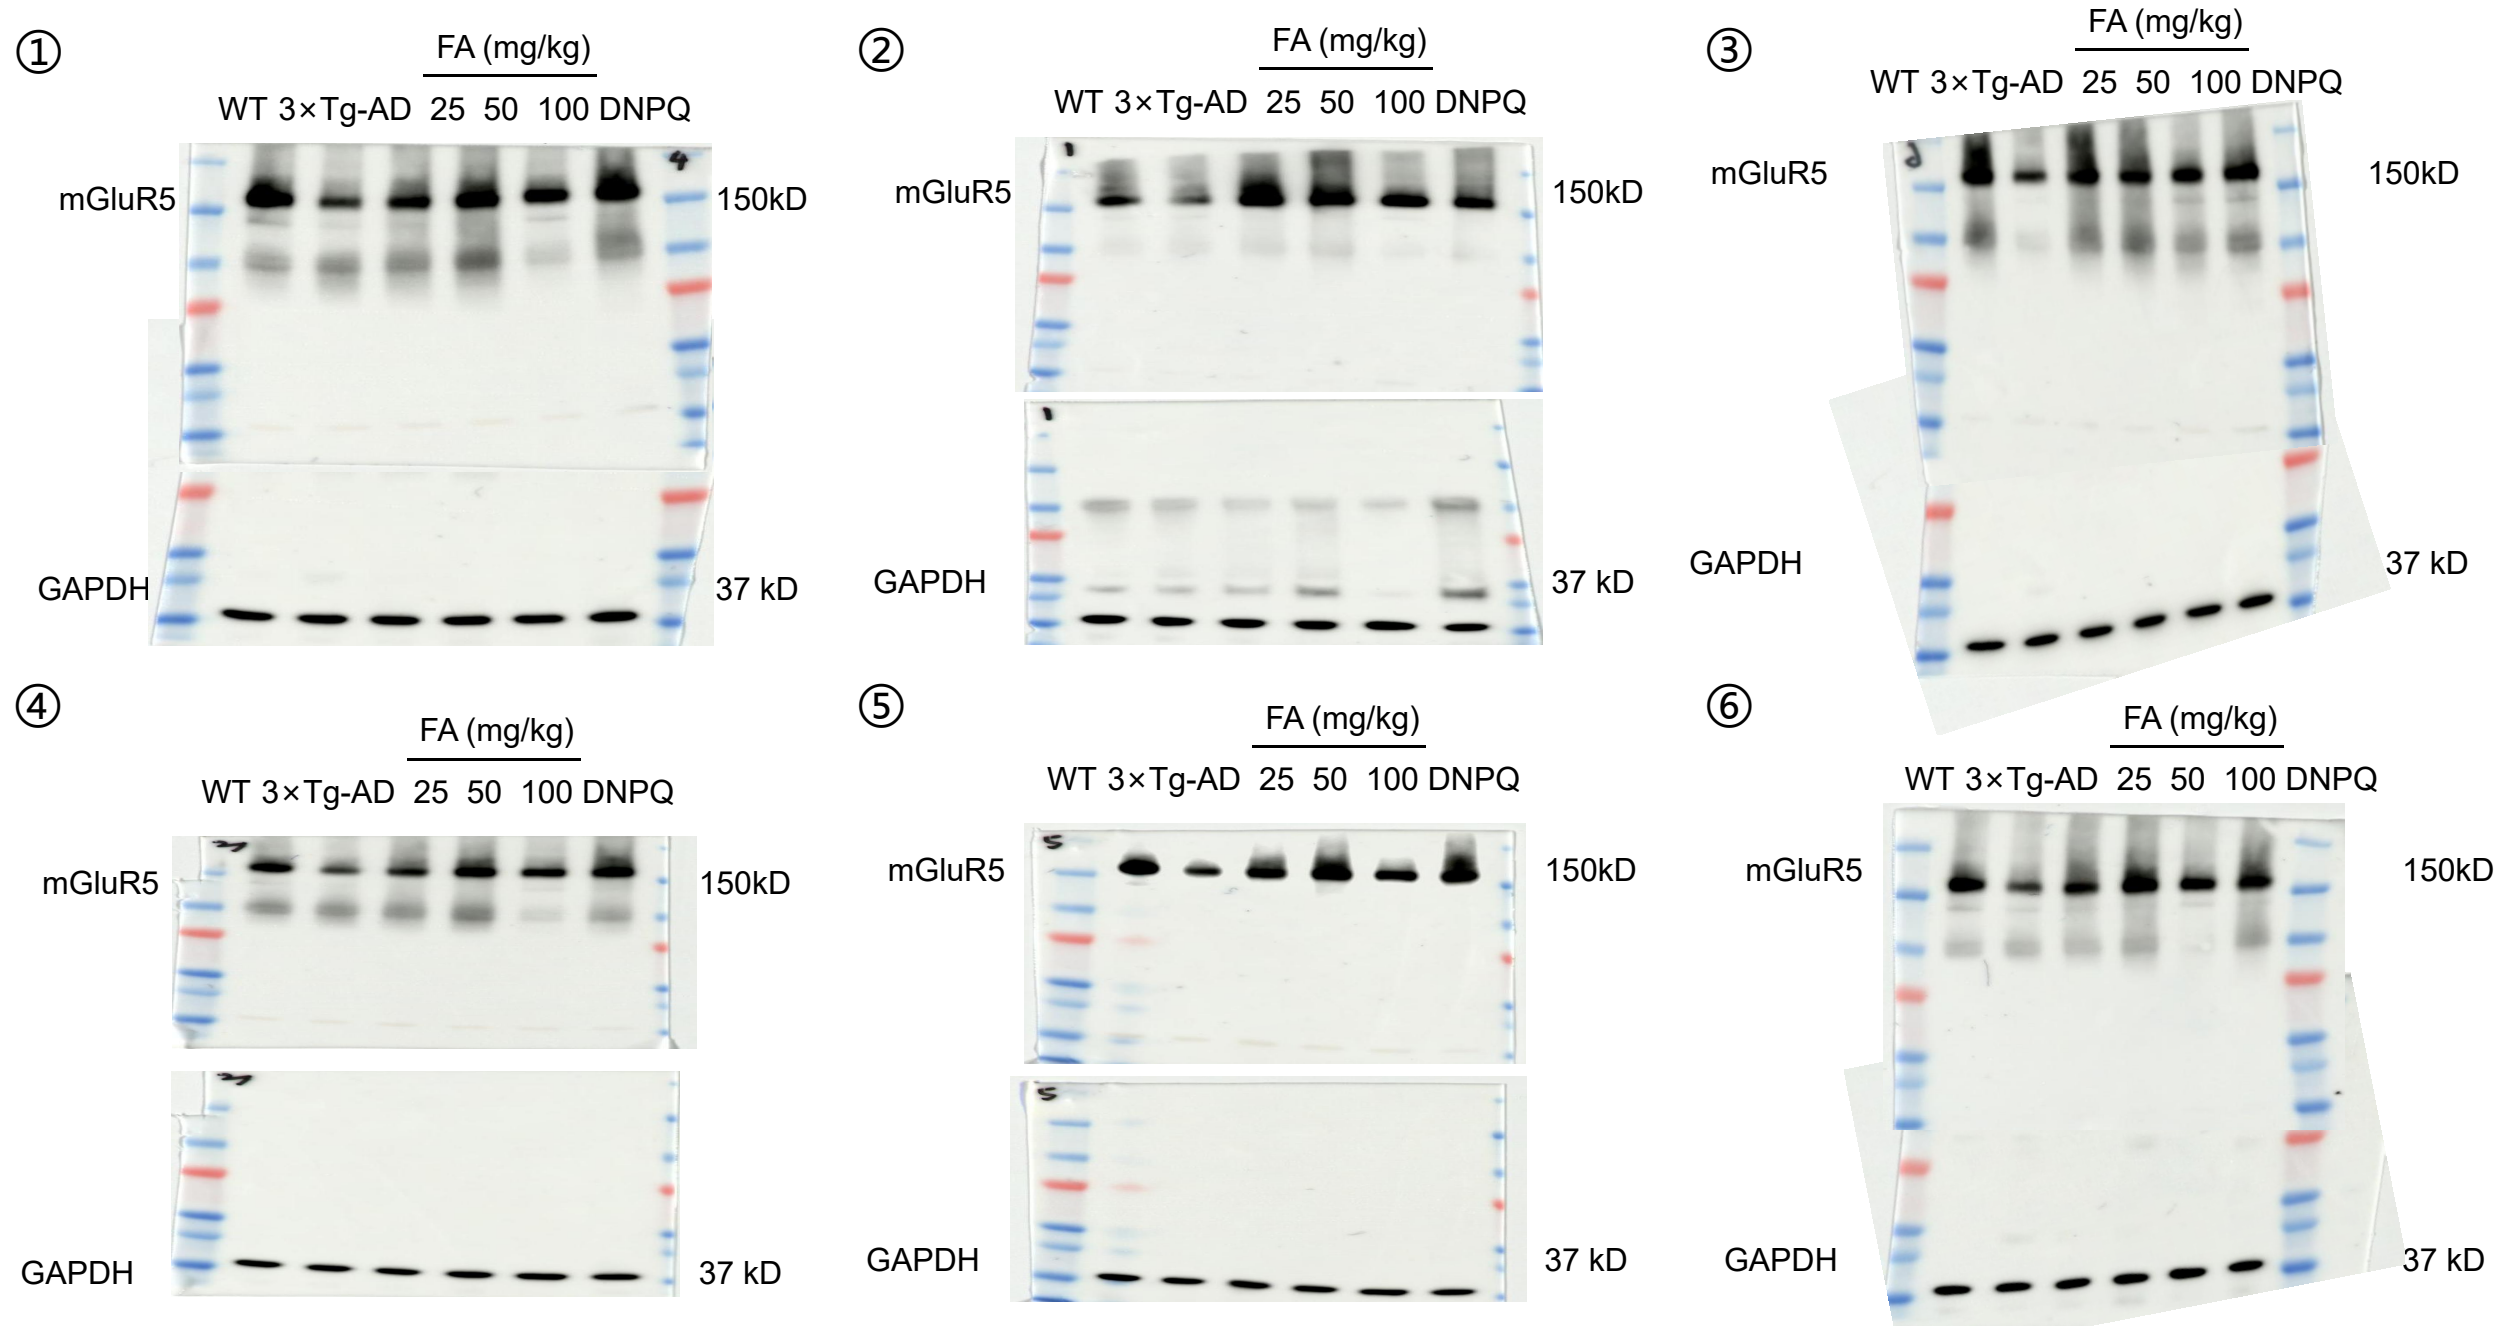

**Figure 6A.** Western blot detected the protein levels of mGluR5, iNOS, p-CaMK II and p-NF- $\kappa$ B in the cortex after FA treatment.

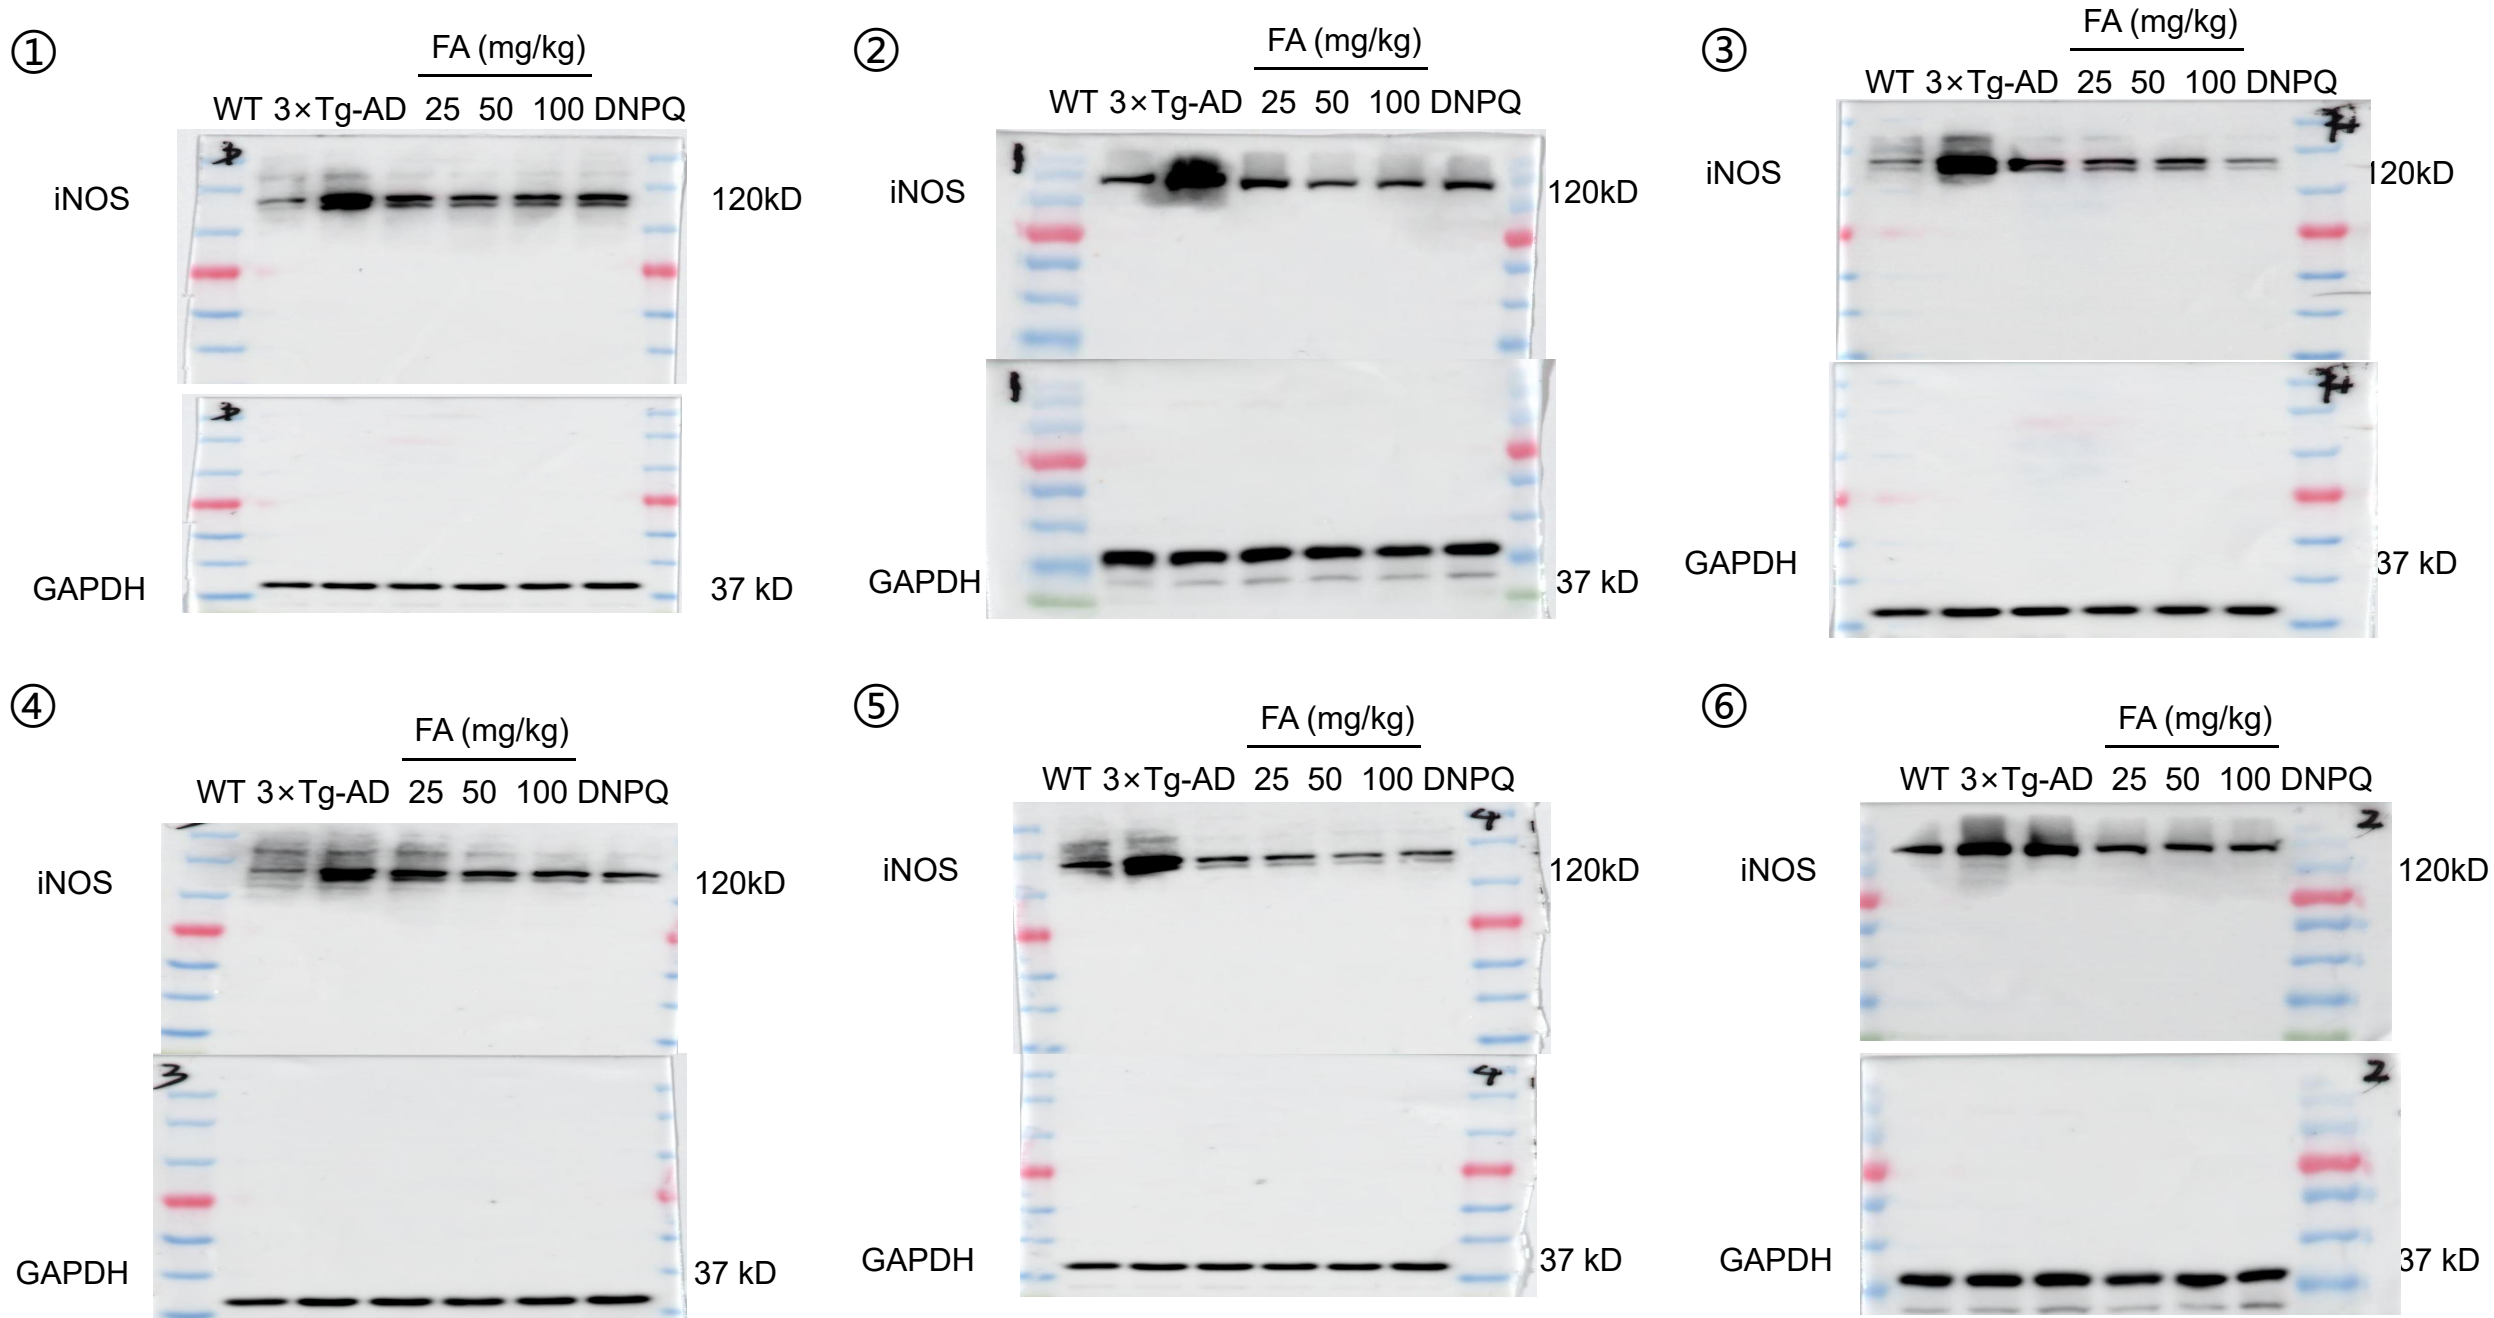

**Figure 6A.** Western blot detected the protein levels of mGluR5, iNOS, p-CaMK II and p-NF- $\kappa$ B in the cortex after FA treatment.

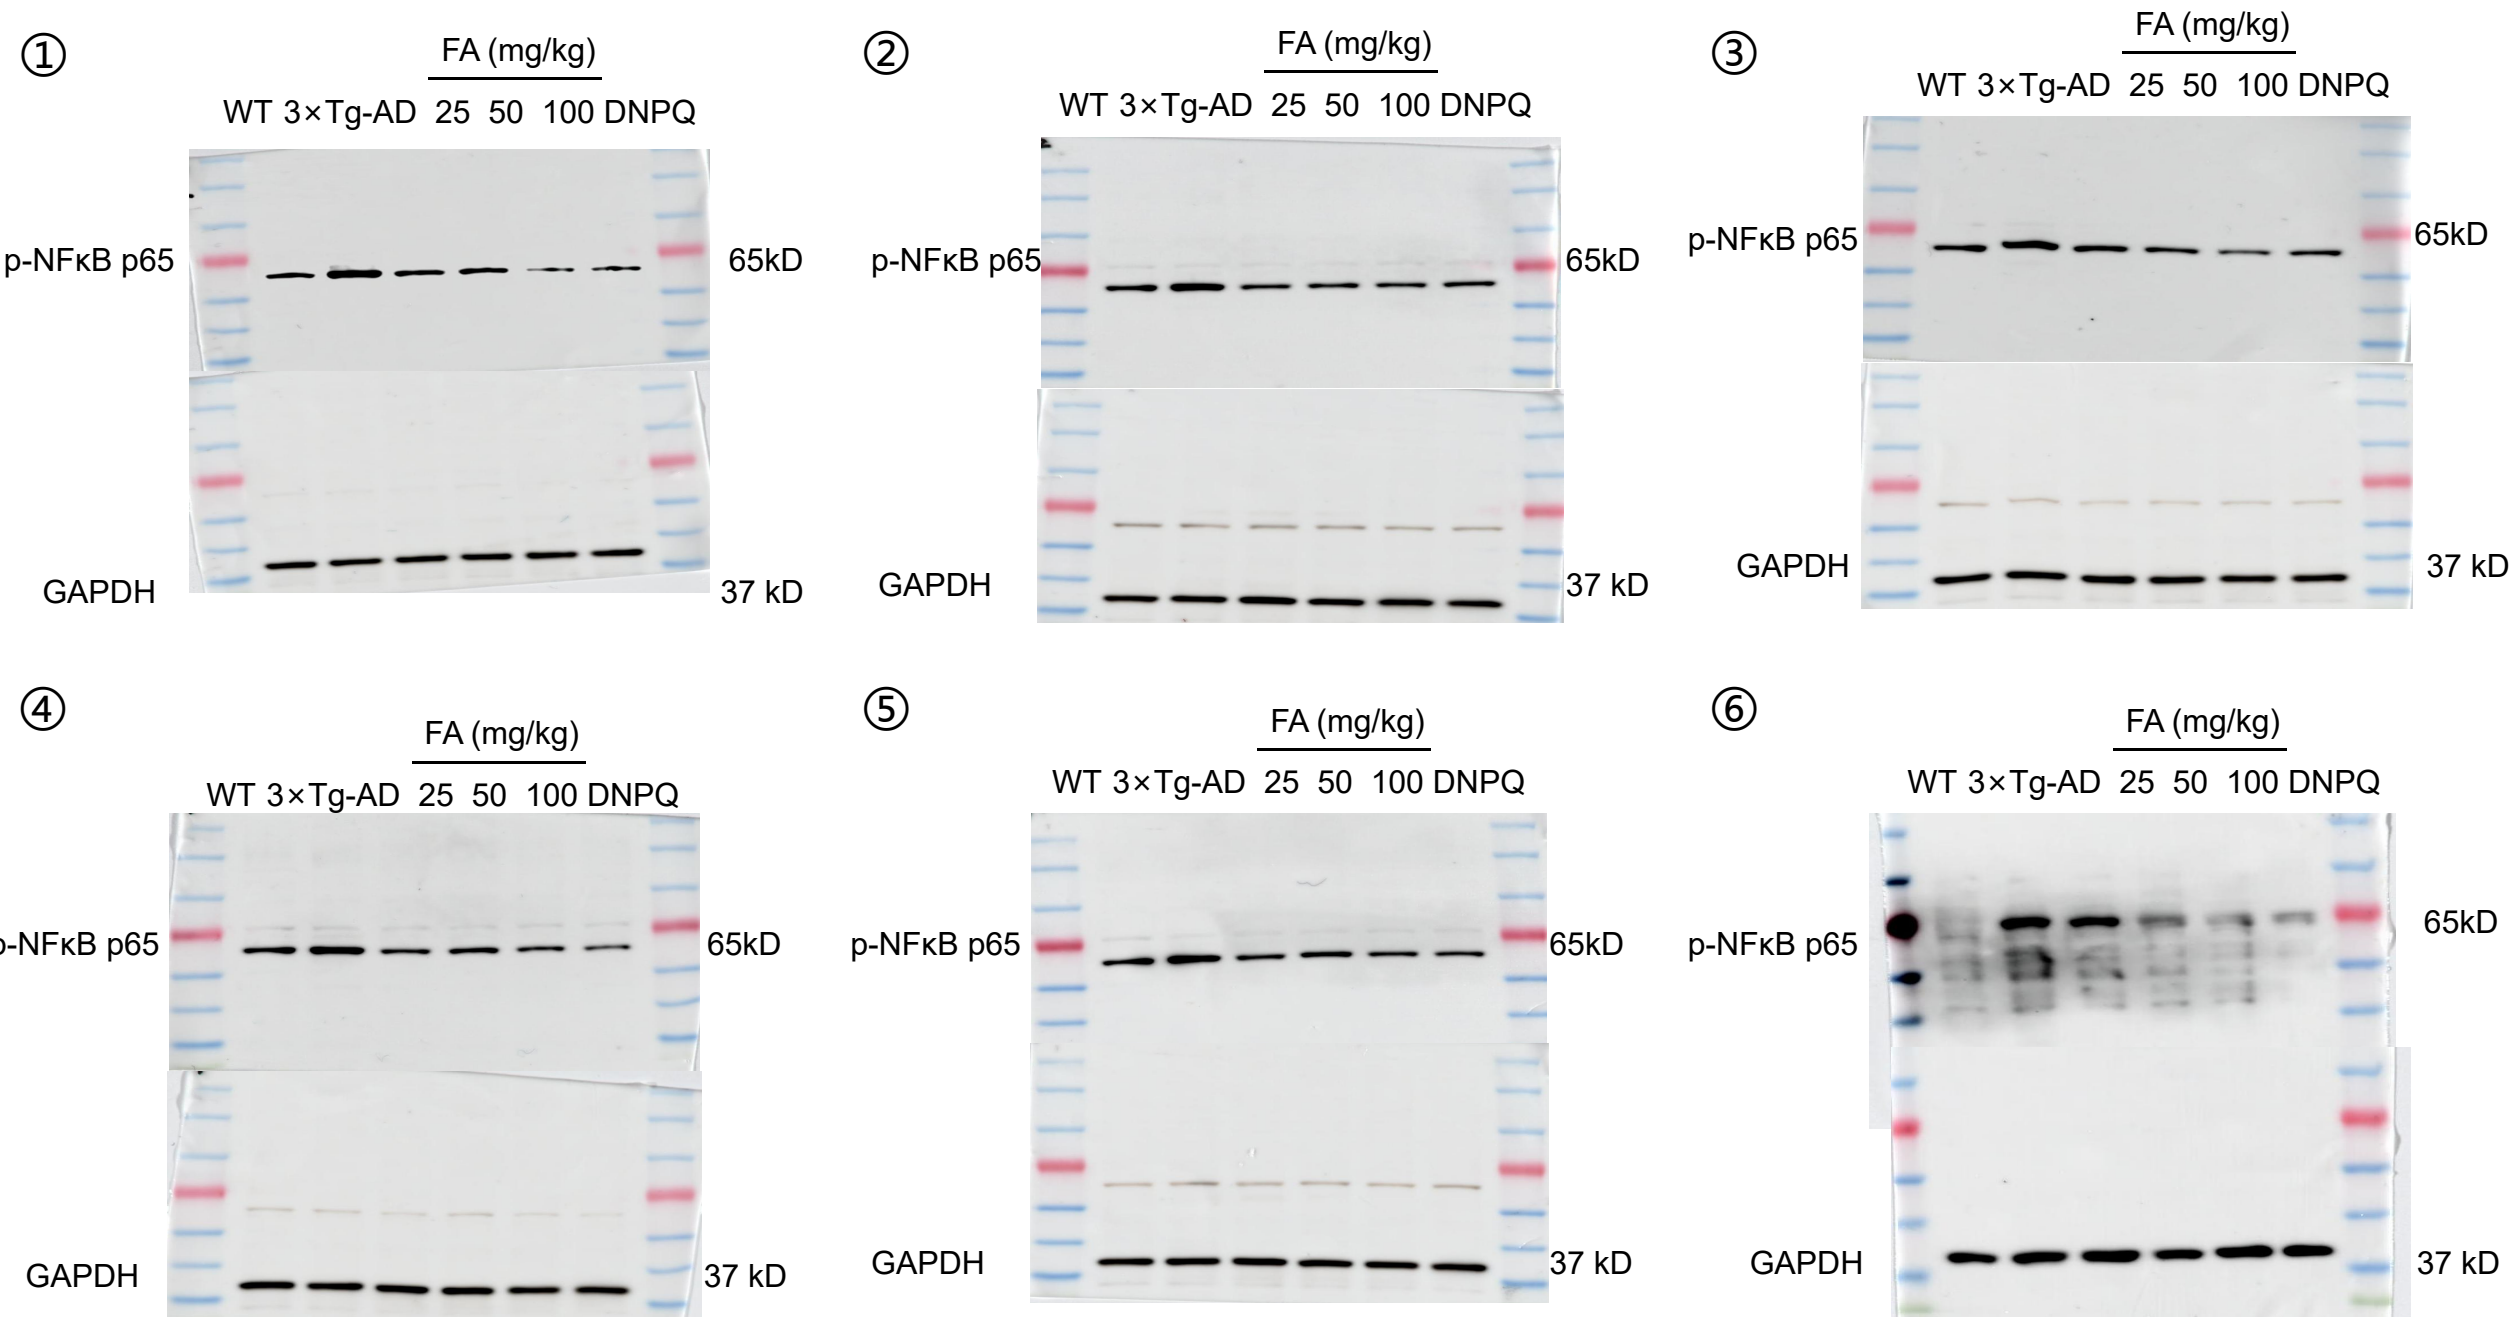

**Figure 6A.** Western blot detected the protein levels of mGluR5, iNOS, p-CaMK II and p-NF- $\kappa$ B in the cortex after FA treatment.

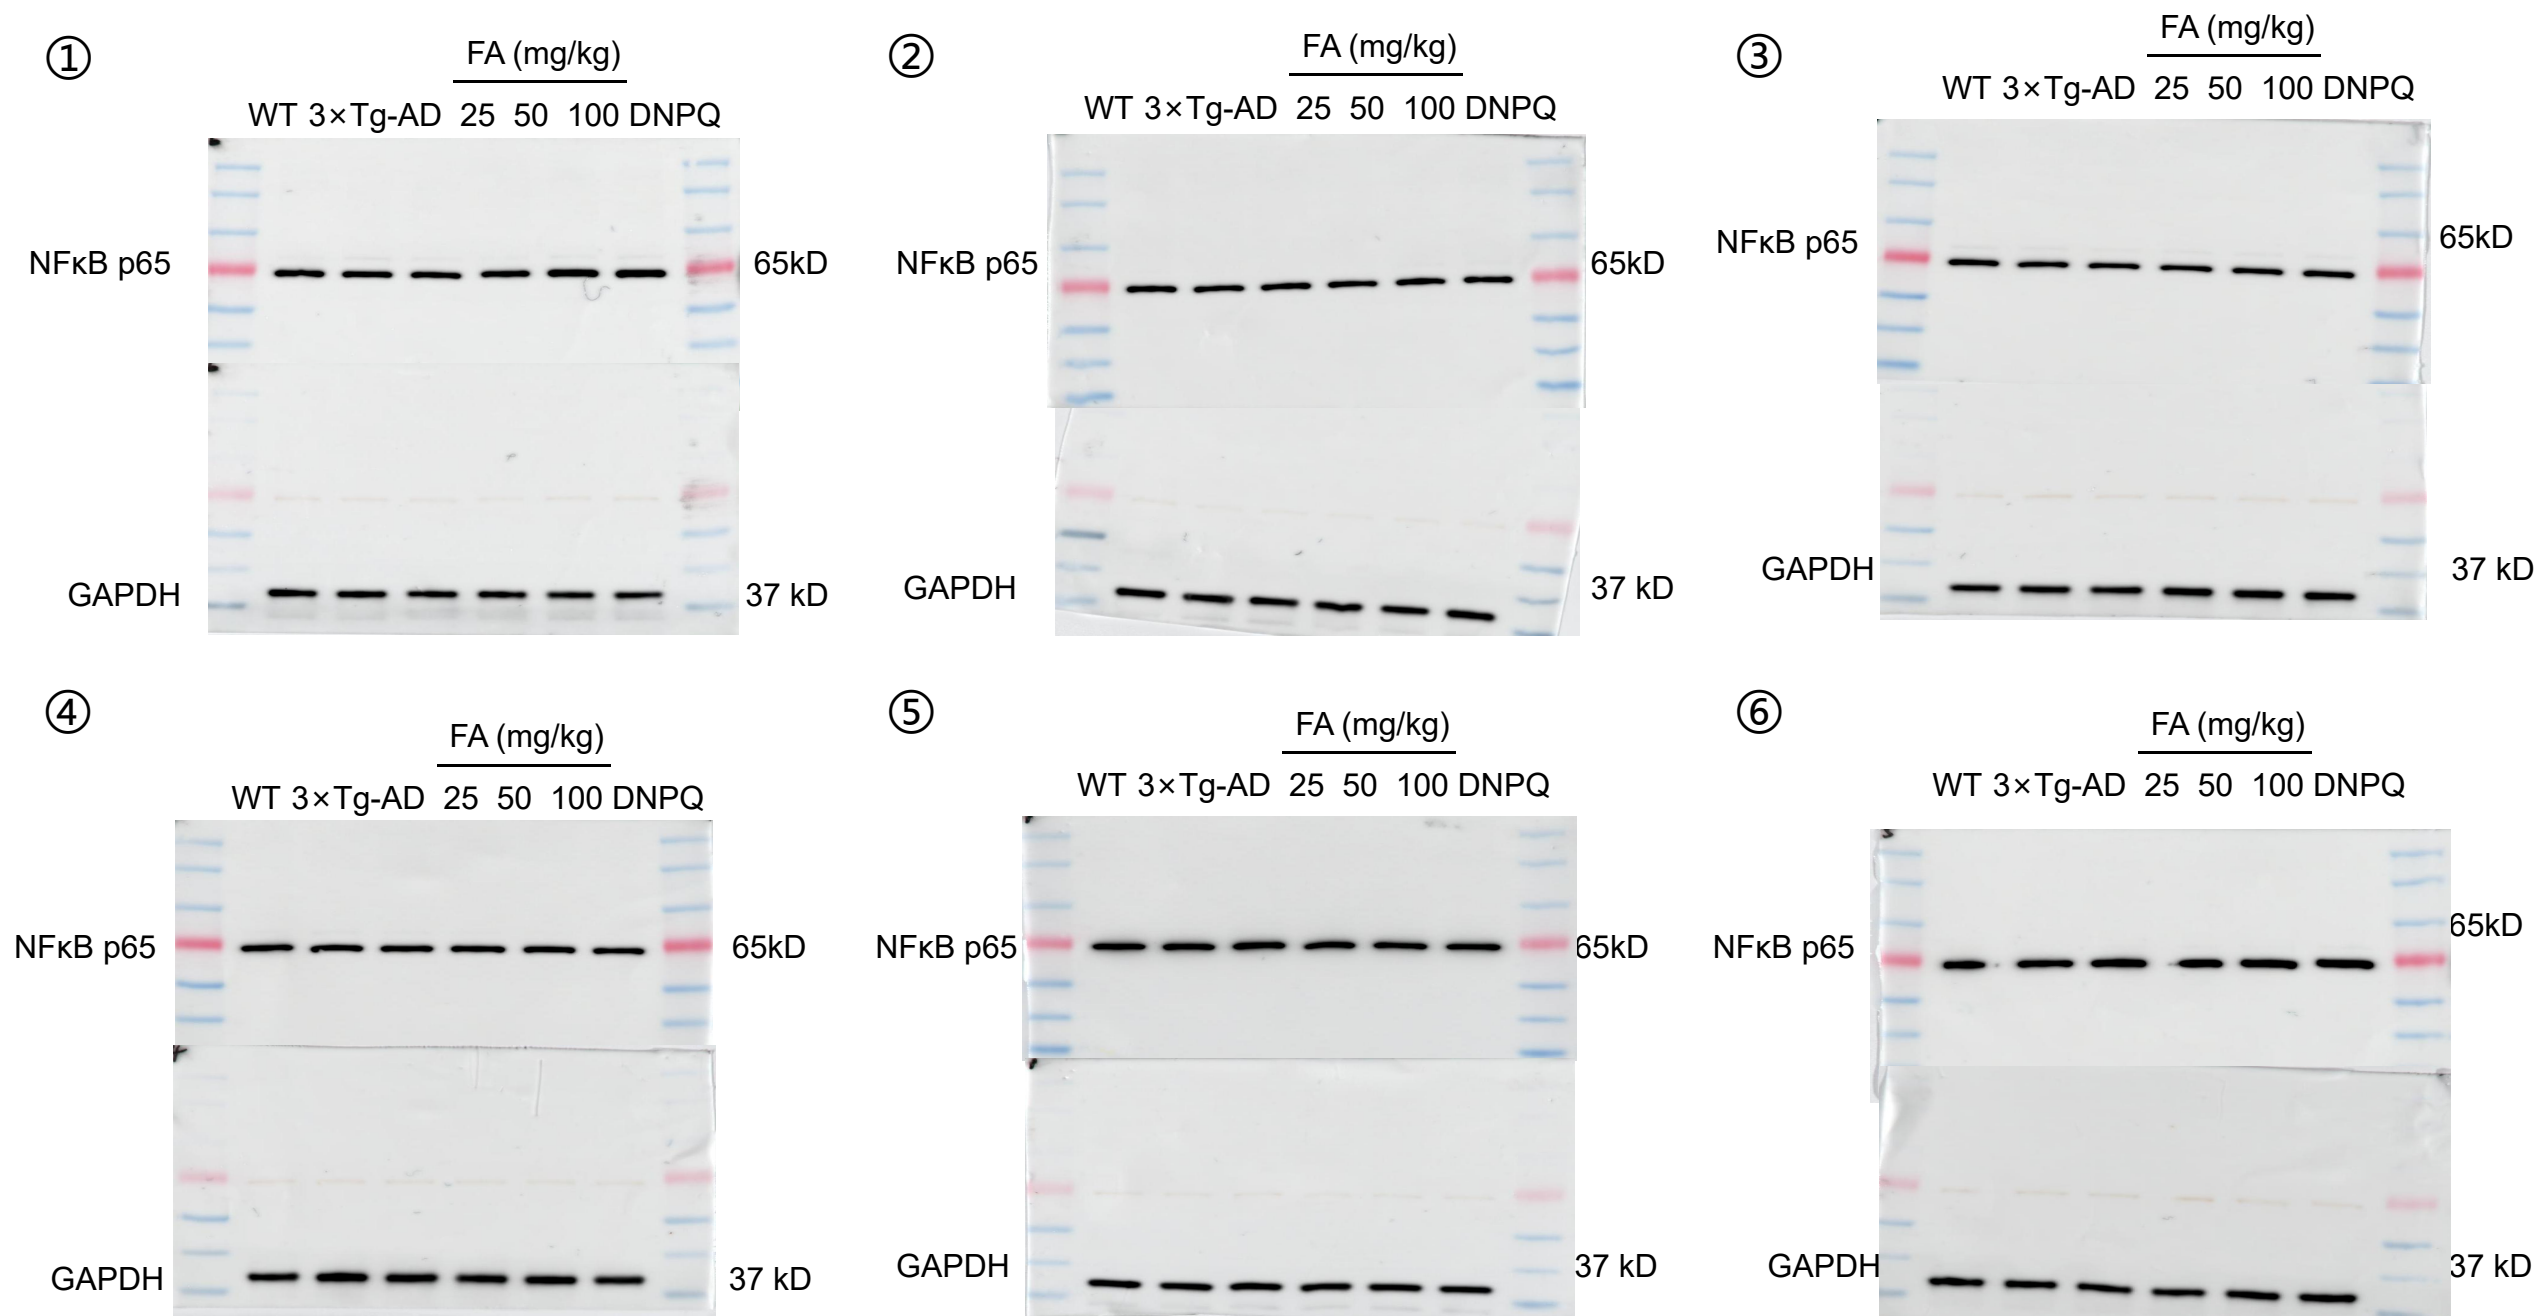

**Figure 6A.** Western blot detected the protein levels of mGluR5, iNOS, p-CaMK II and p-NF- $\kappa$ B in the cortex after FA treatment.

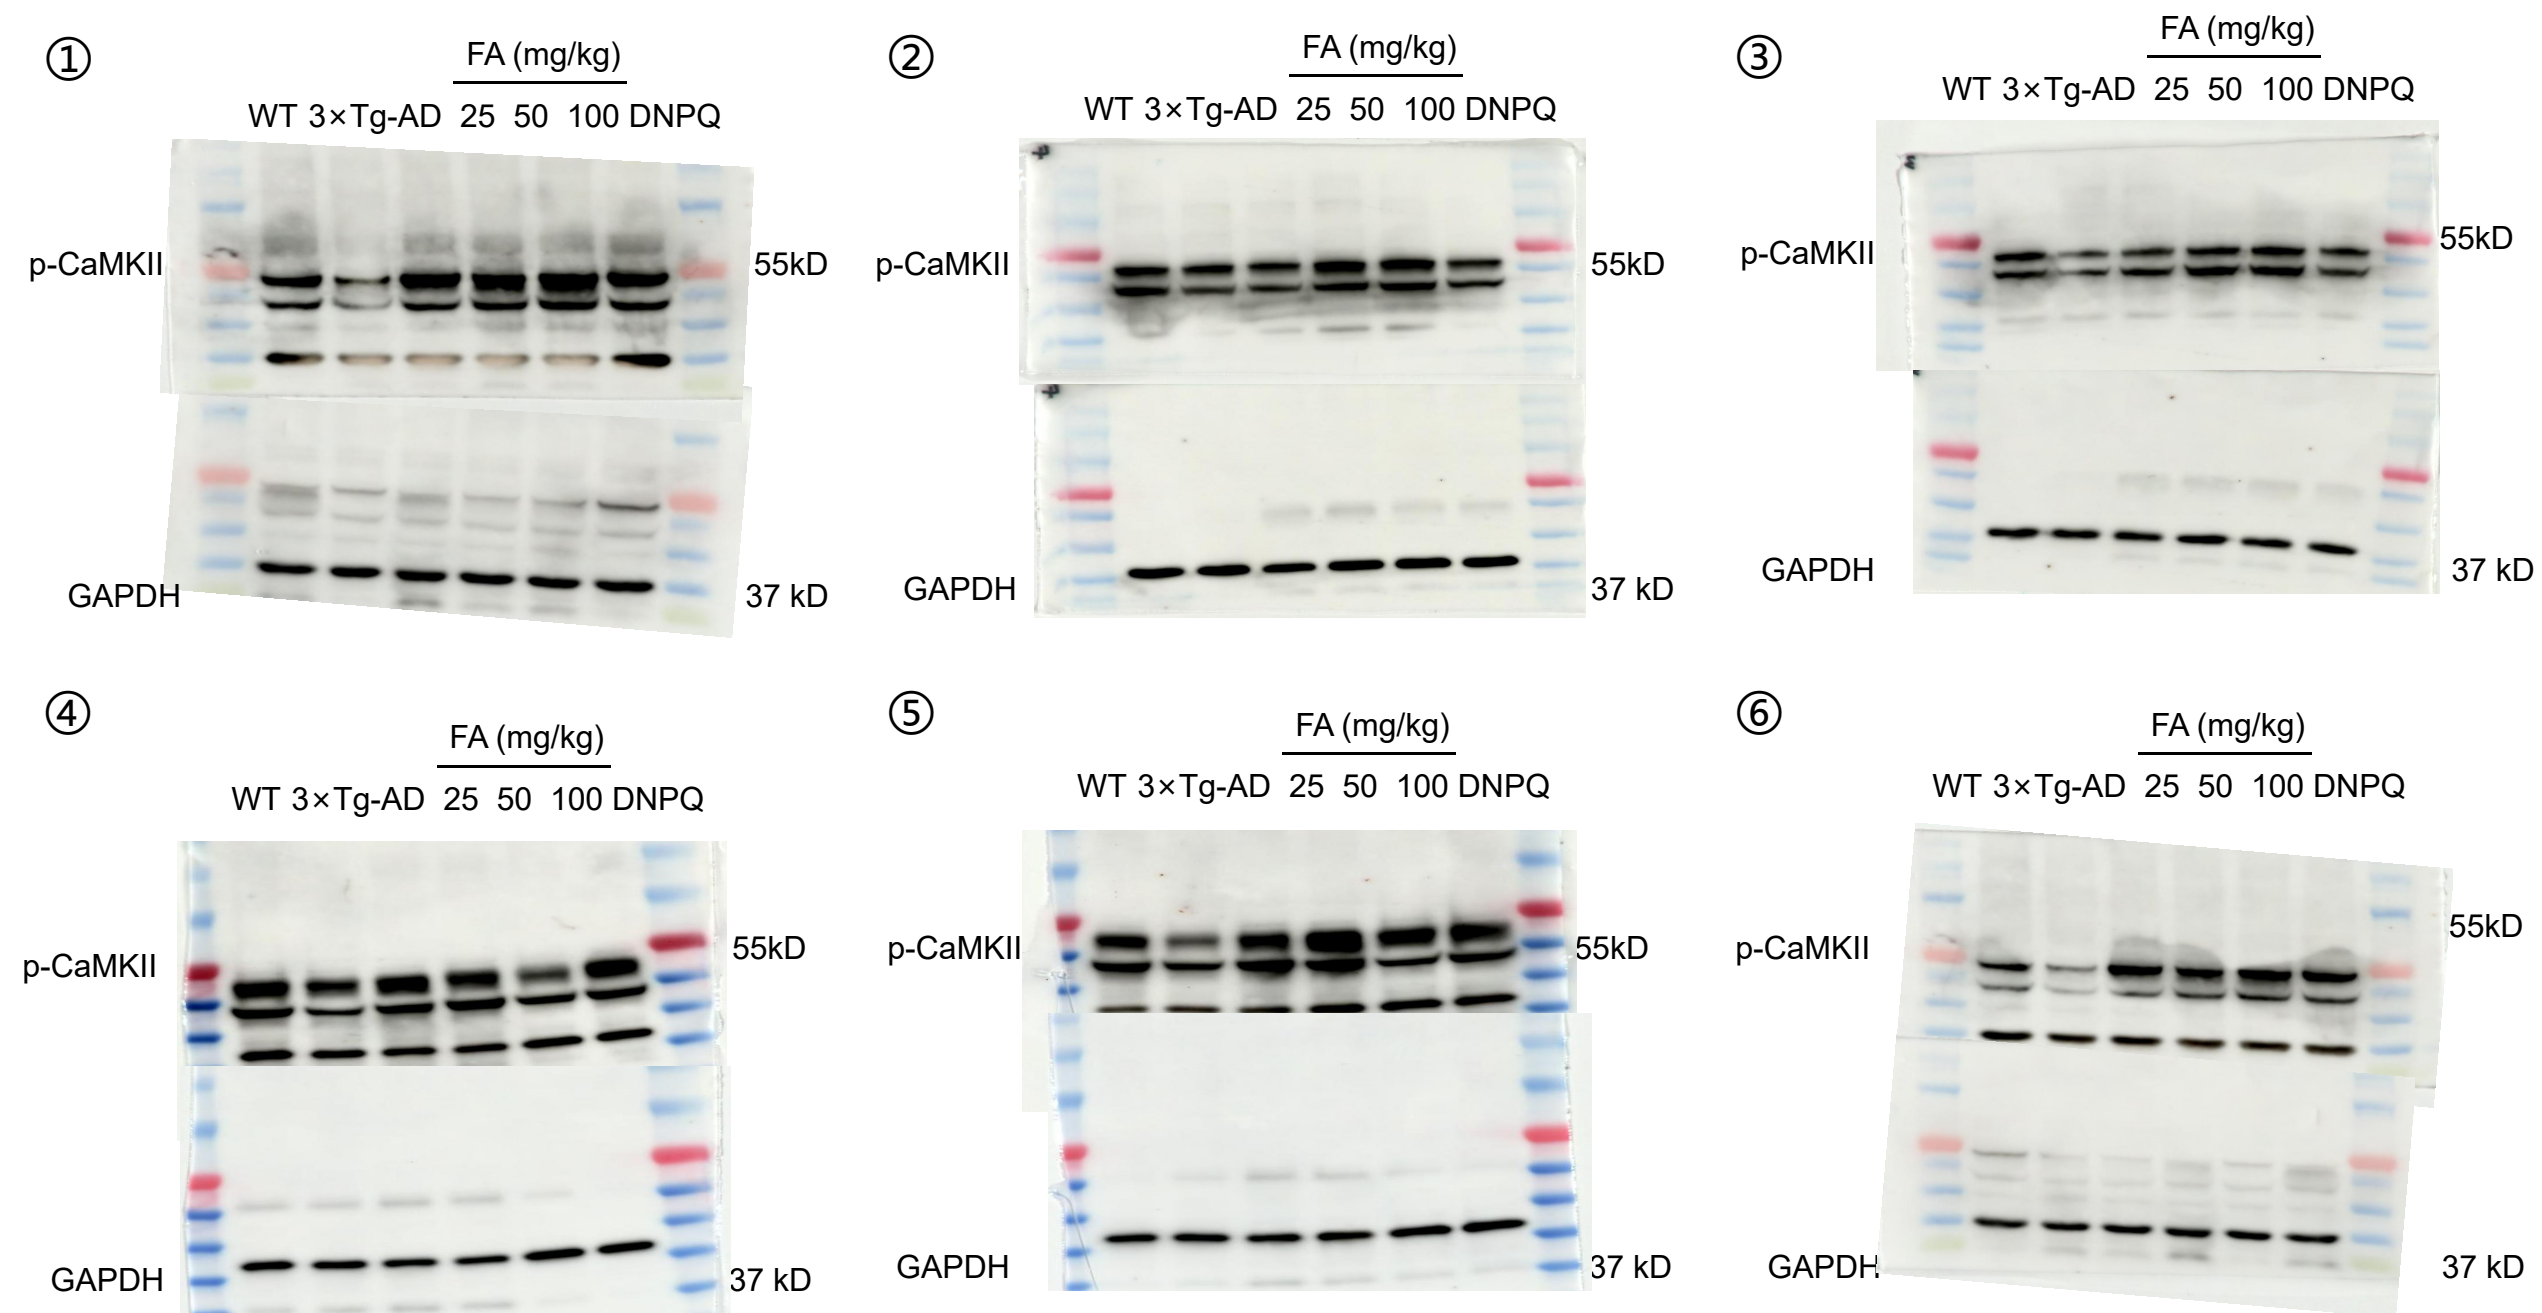

**Figure 6A.** Western blot detected the protein levels of mGluR5, iNOS, p-CaMK II and p-NF-κB in the cortex after FA treatment.

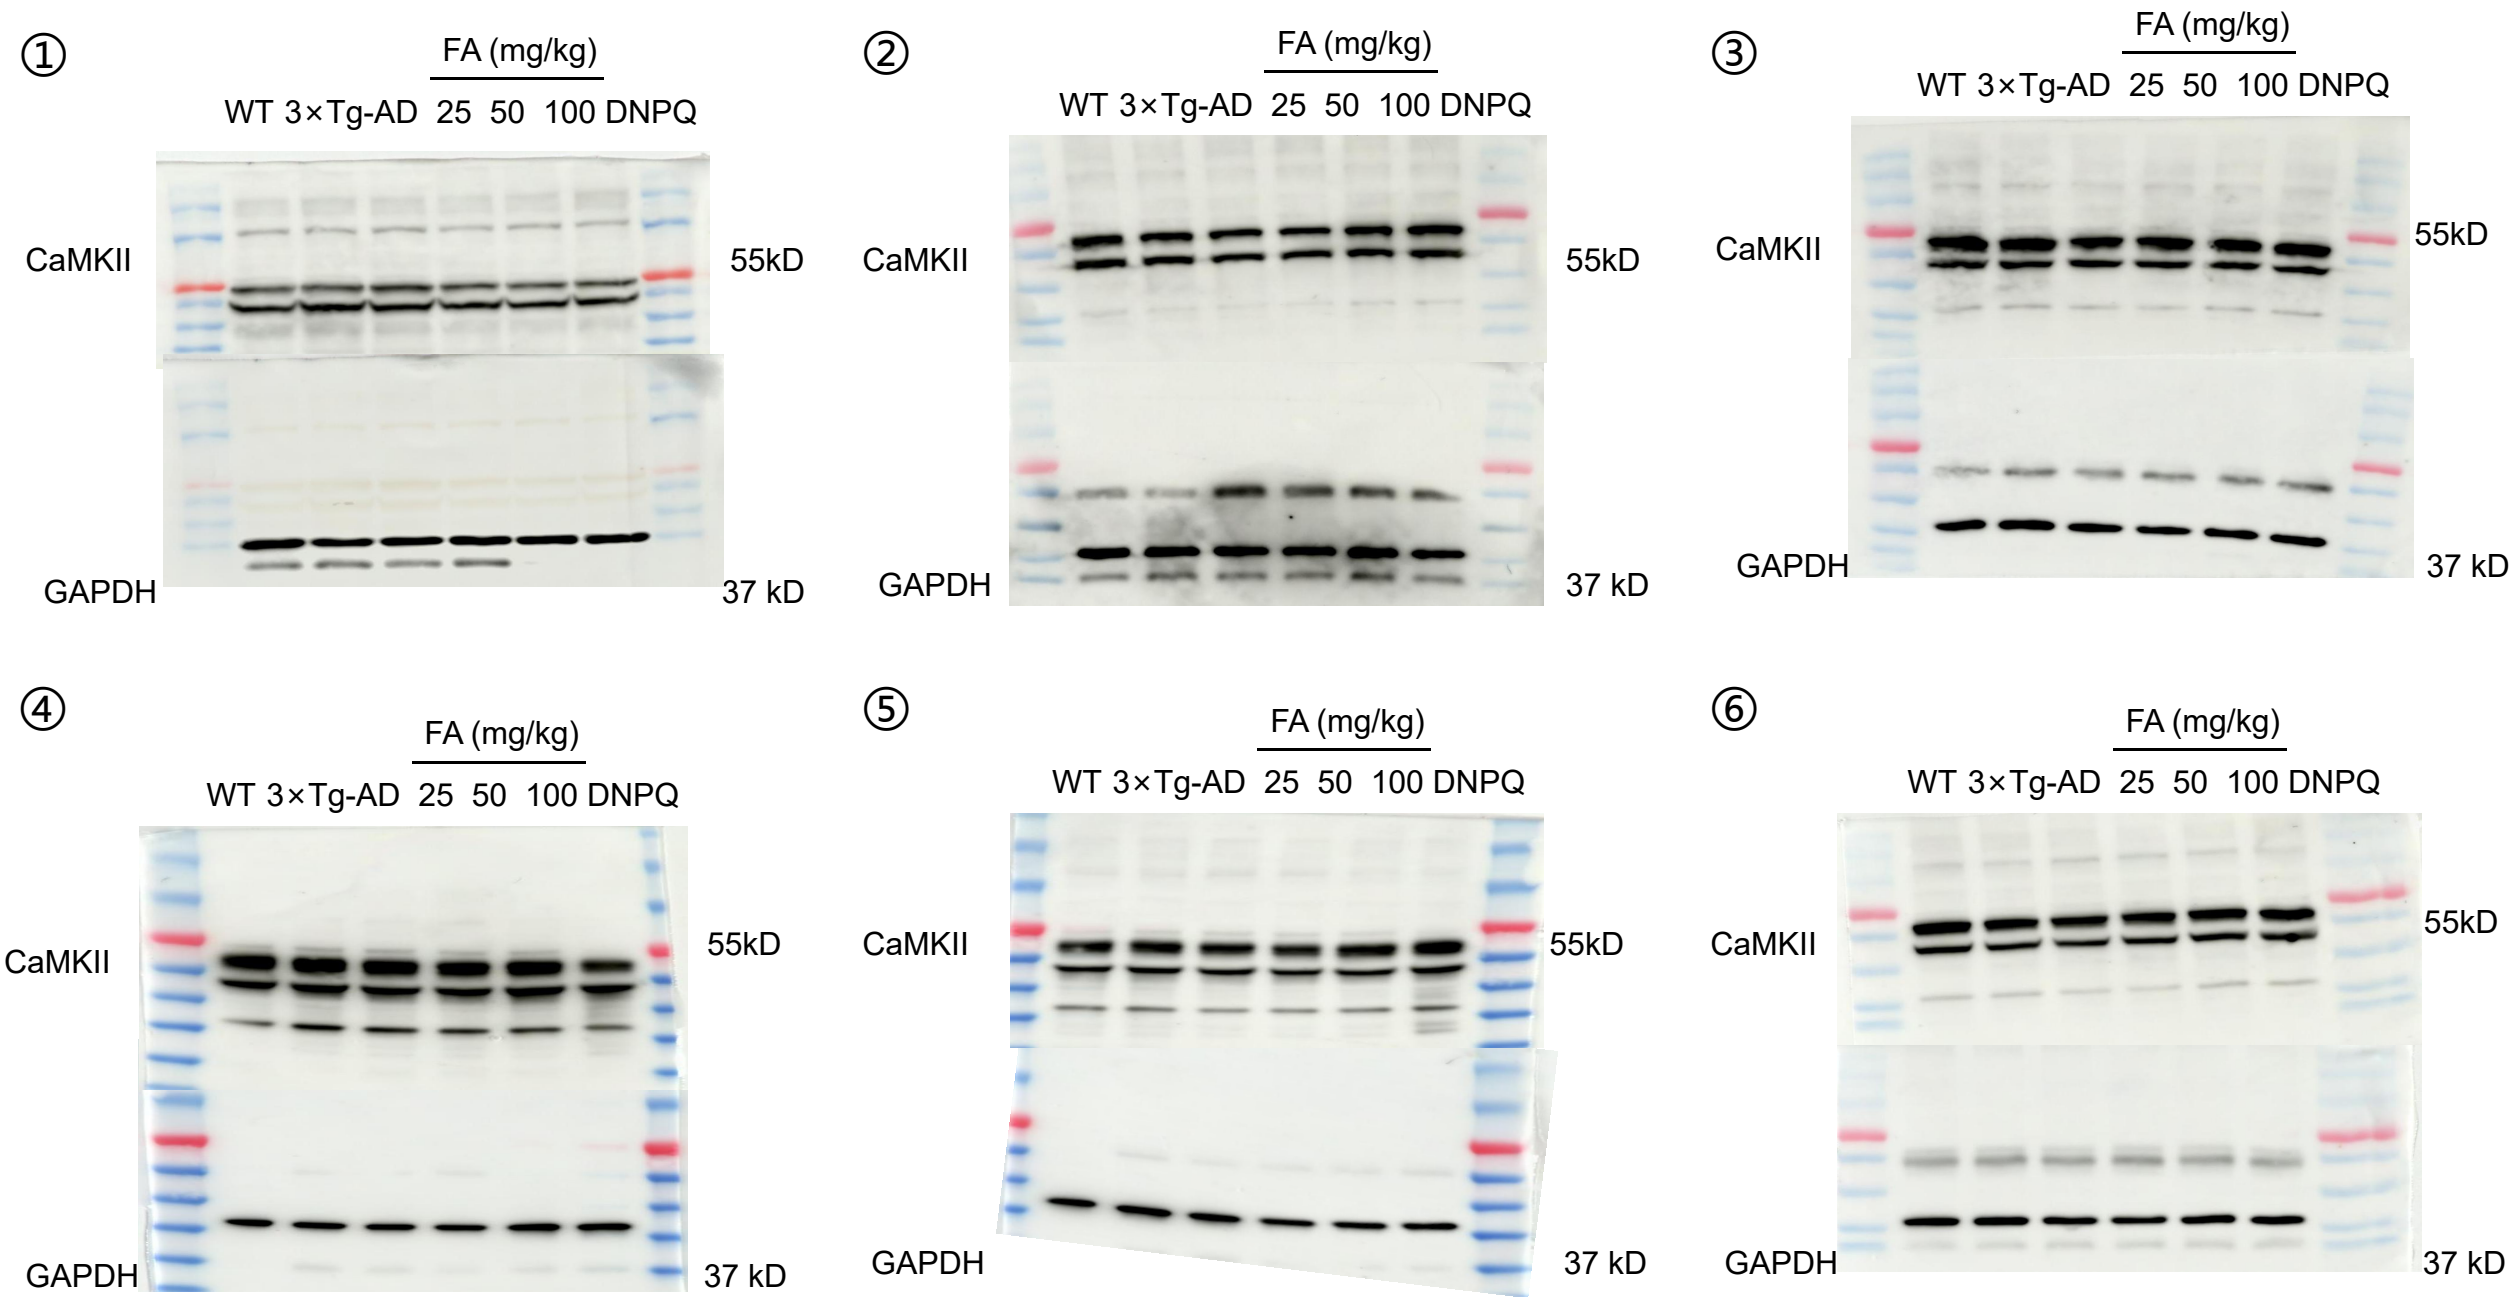

**Figure 6F.** Western blot detected the protein levels of mGluR5, iNOS, p-CaMK II and p-NF- $\kappa$ B in the hippocampus after FA treatment.

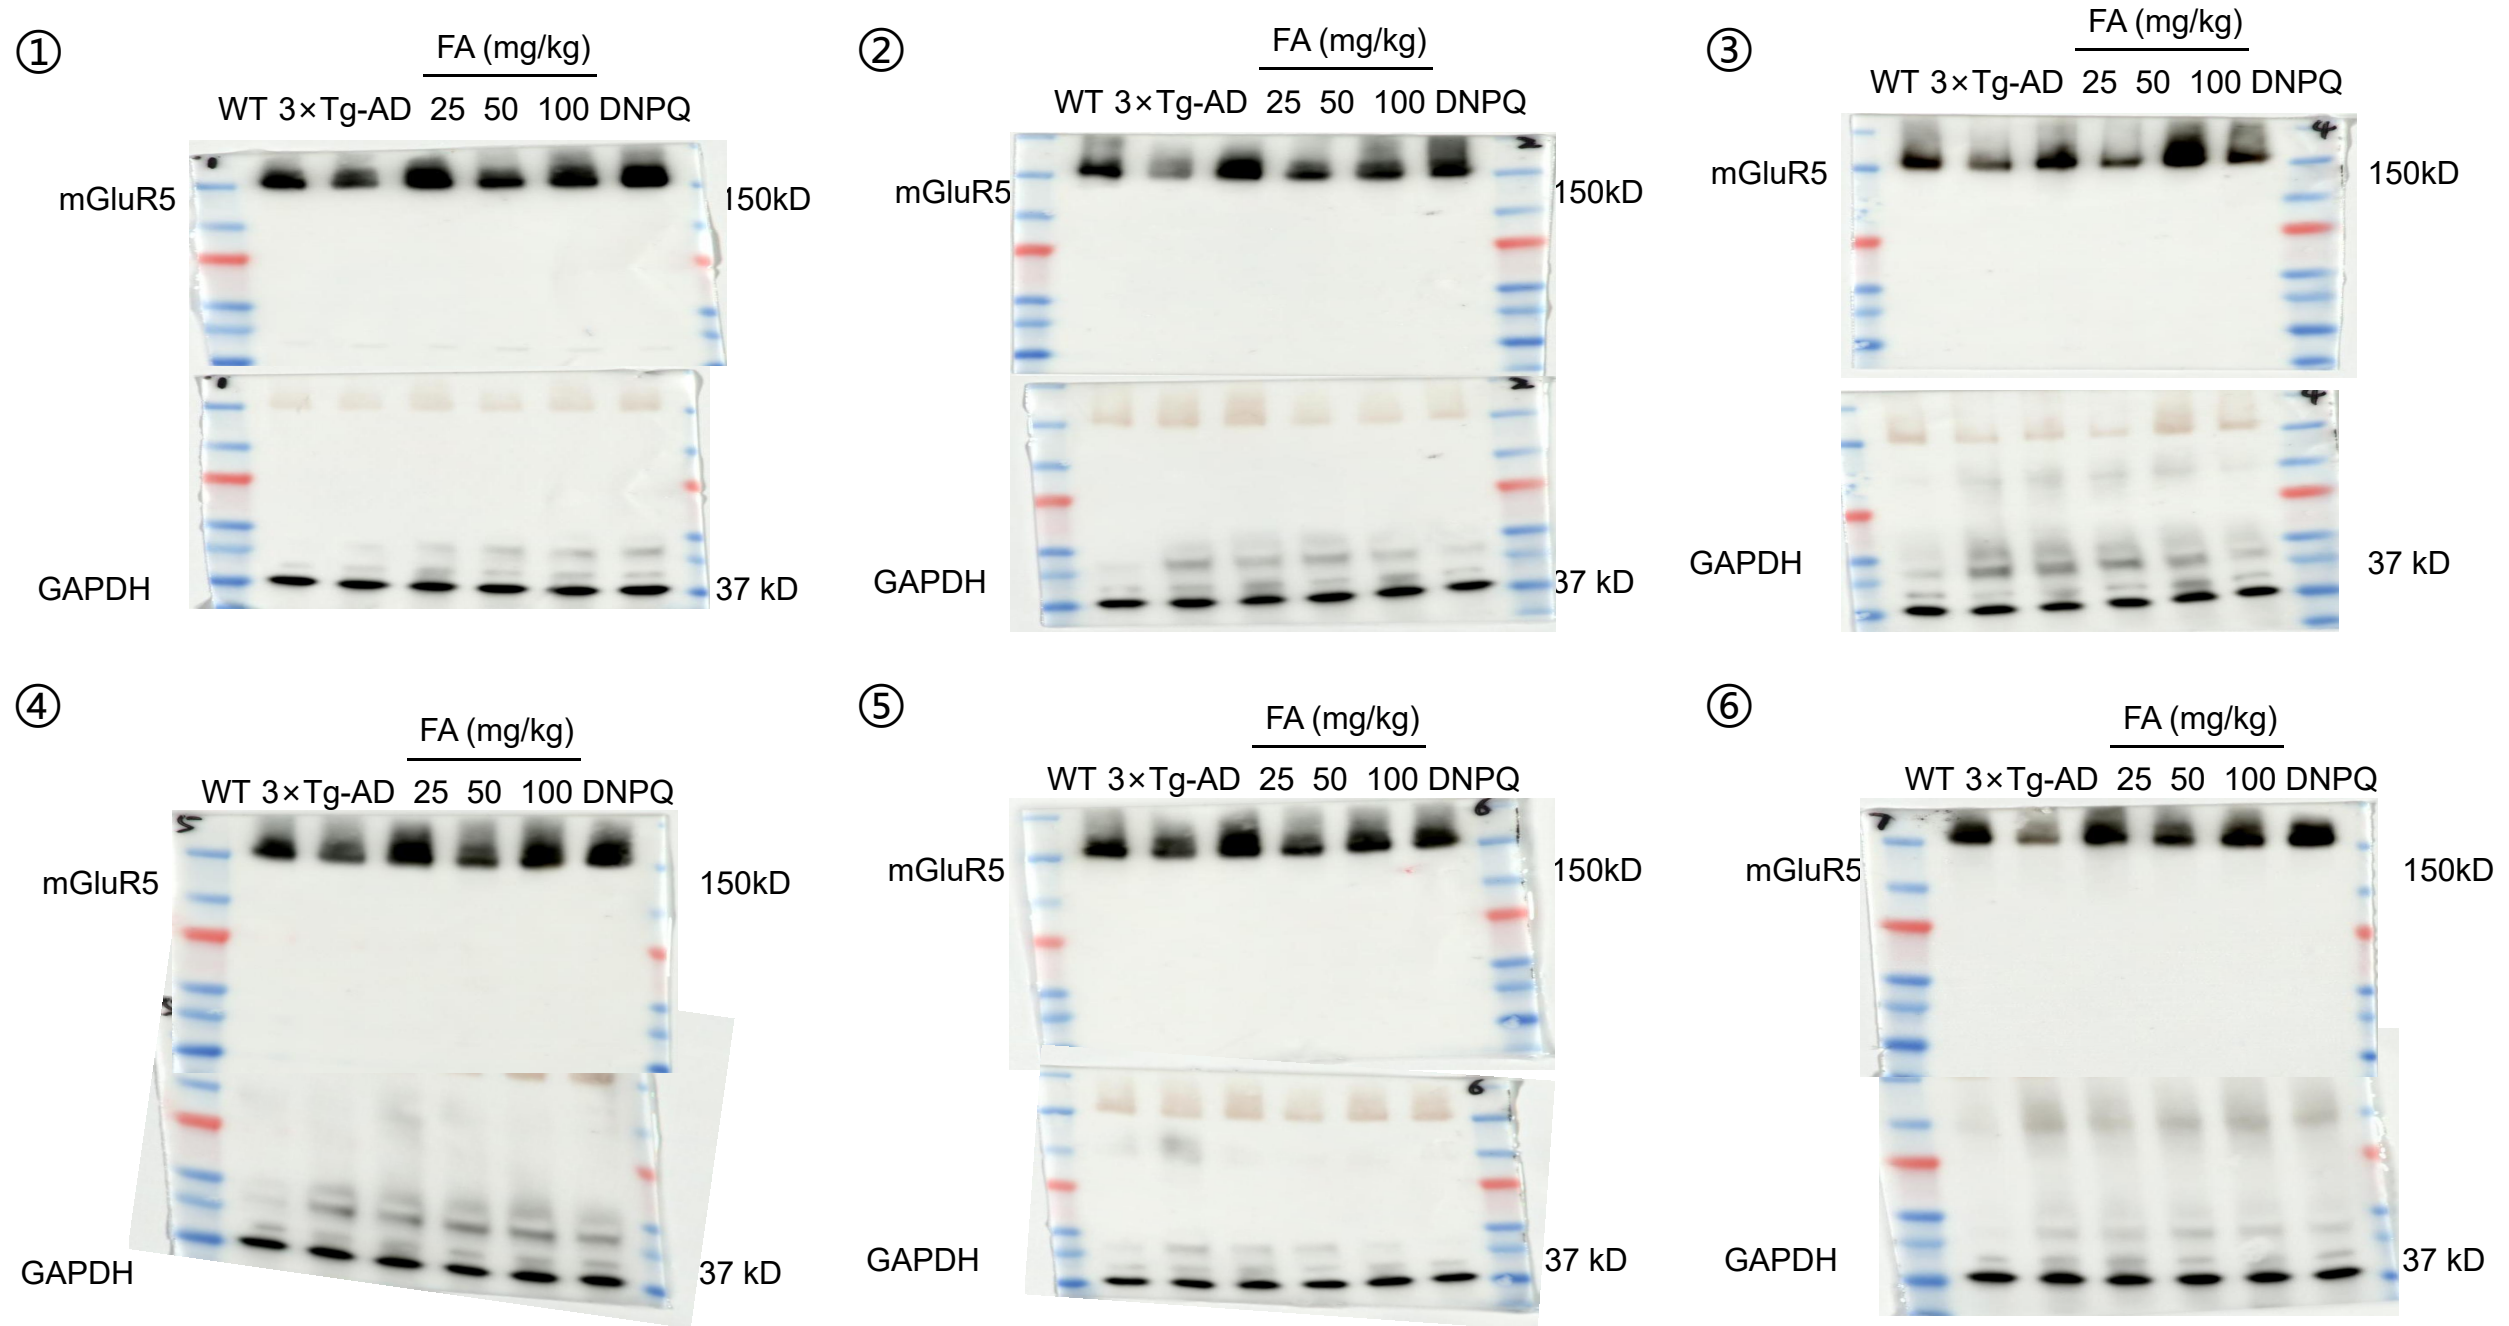

**Figure 6F.** Western blot detected the protein levels of mGluR5, iNOS, p-CaMK II and p-NF- $\kappa$ B in the hippocampus after FA treatment.

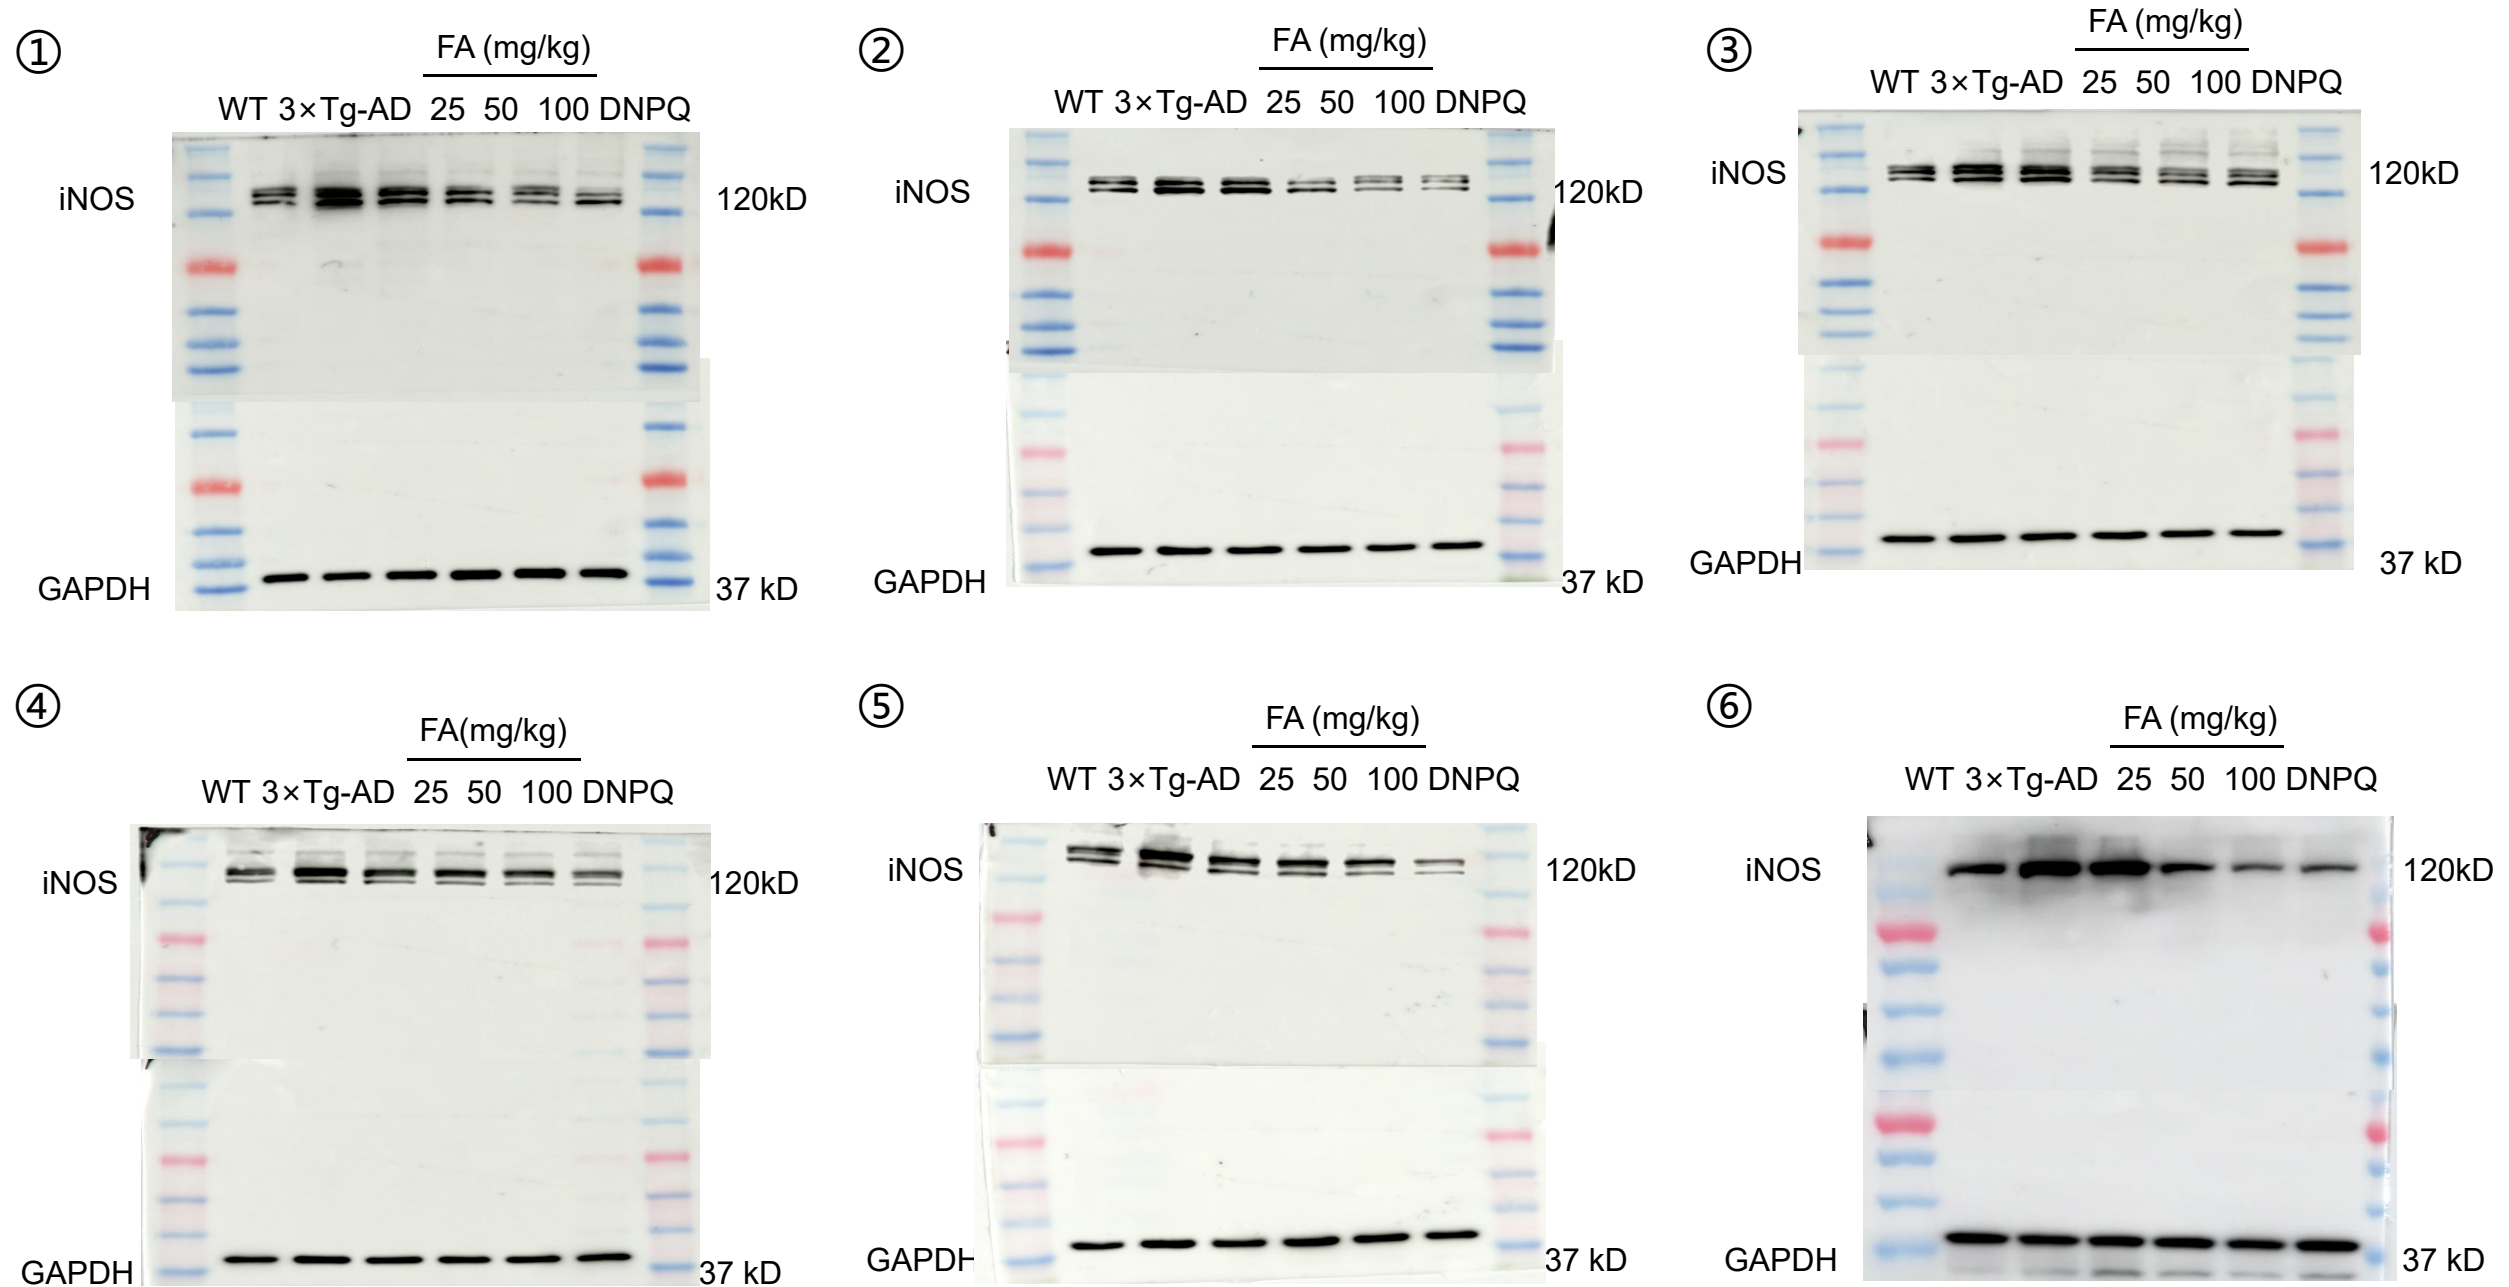

**Figure 6F.** Western blot detected the protein levels of mGluR5, iNOS, p-CaMK II and p-NF- $\kappa$ B in the hippocampus after FA treatment.

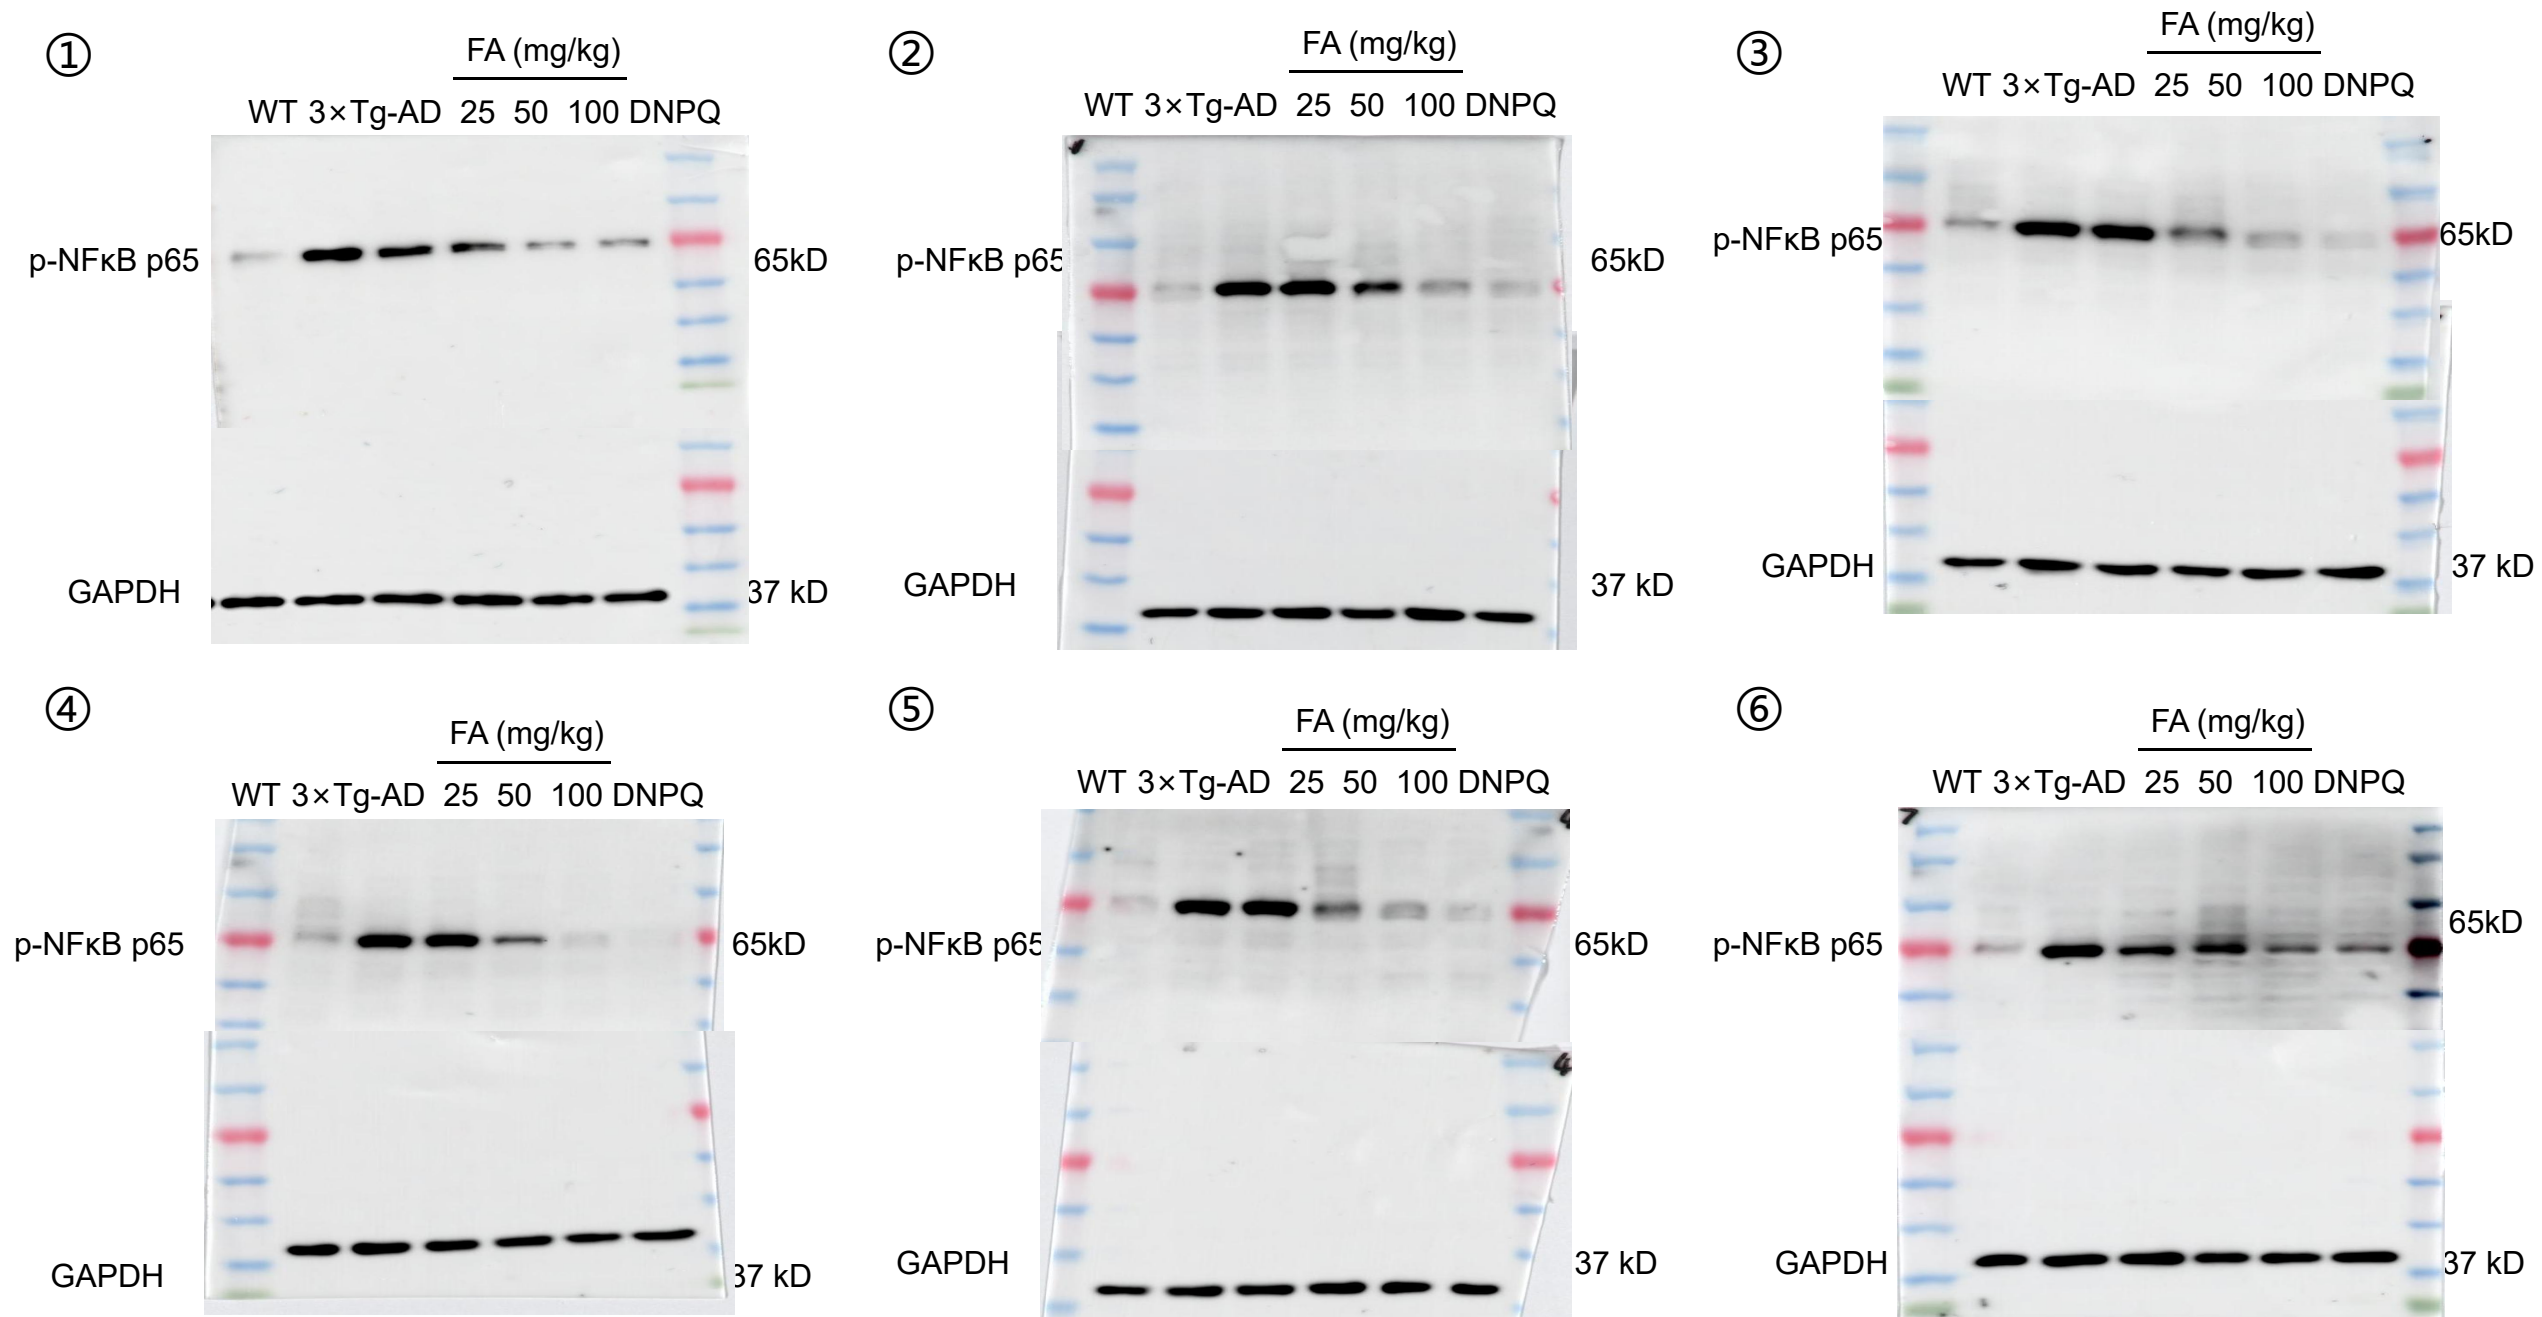

**Figure 6F.** Western blot detected the protein levels of mGluR5, iNOS, p-CaMK II and p-NF- $\kappa$ B in the hippocampus after FA treatment.

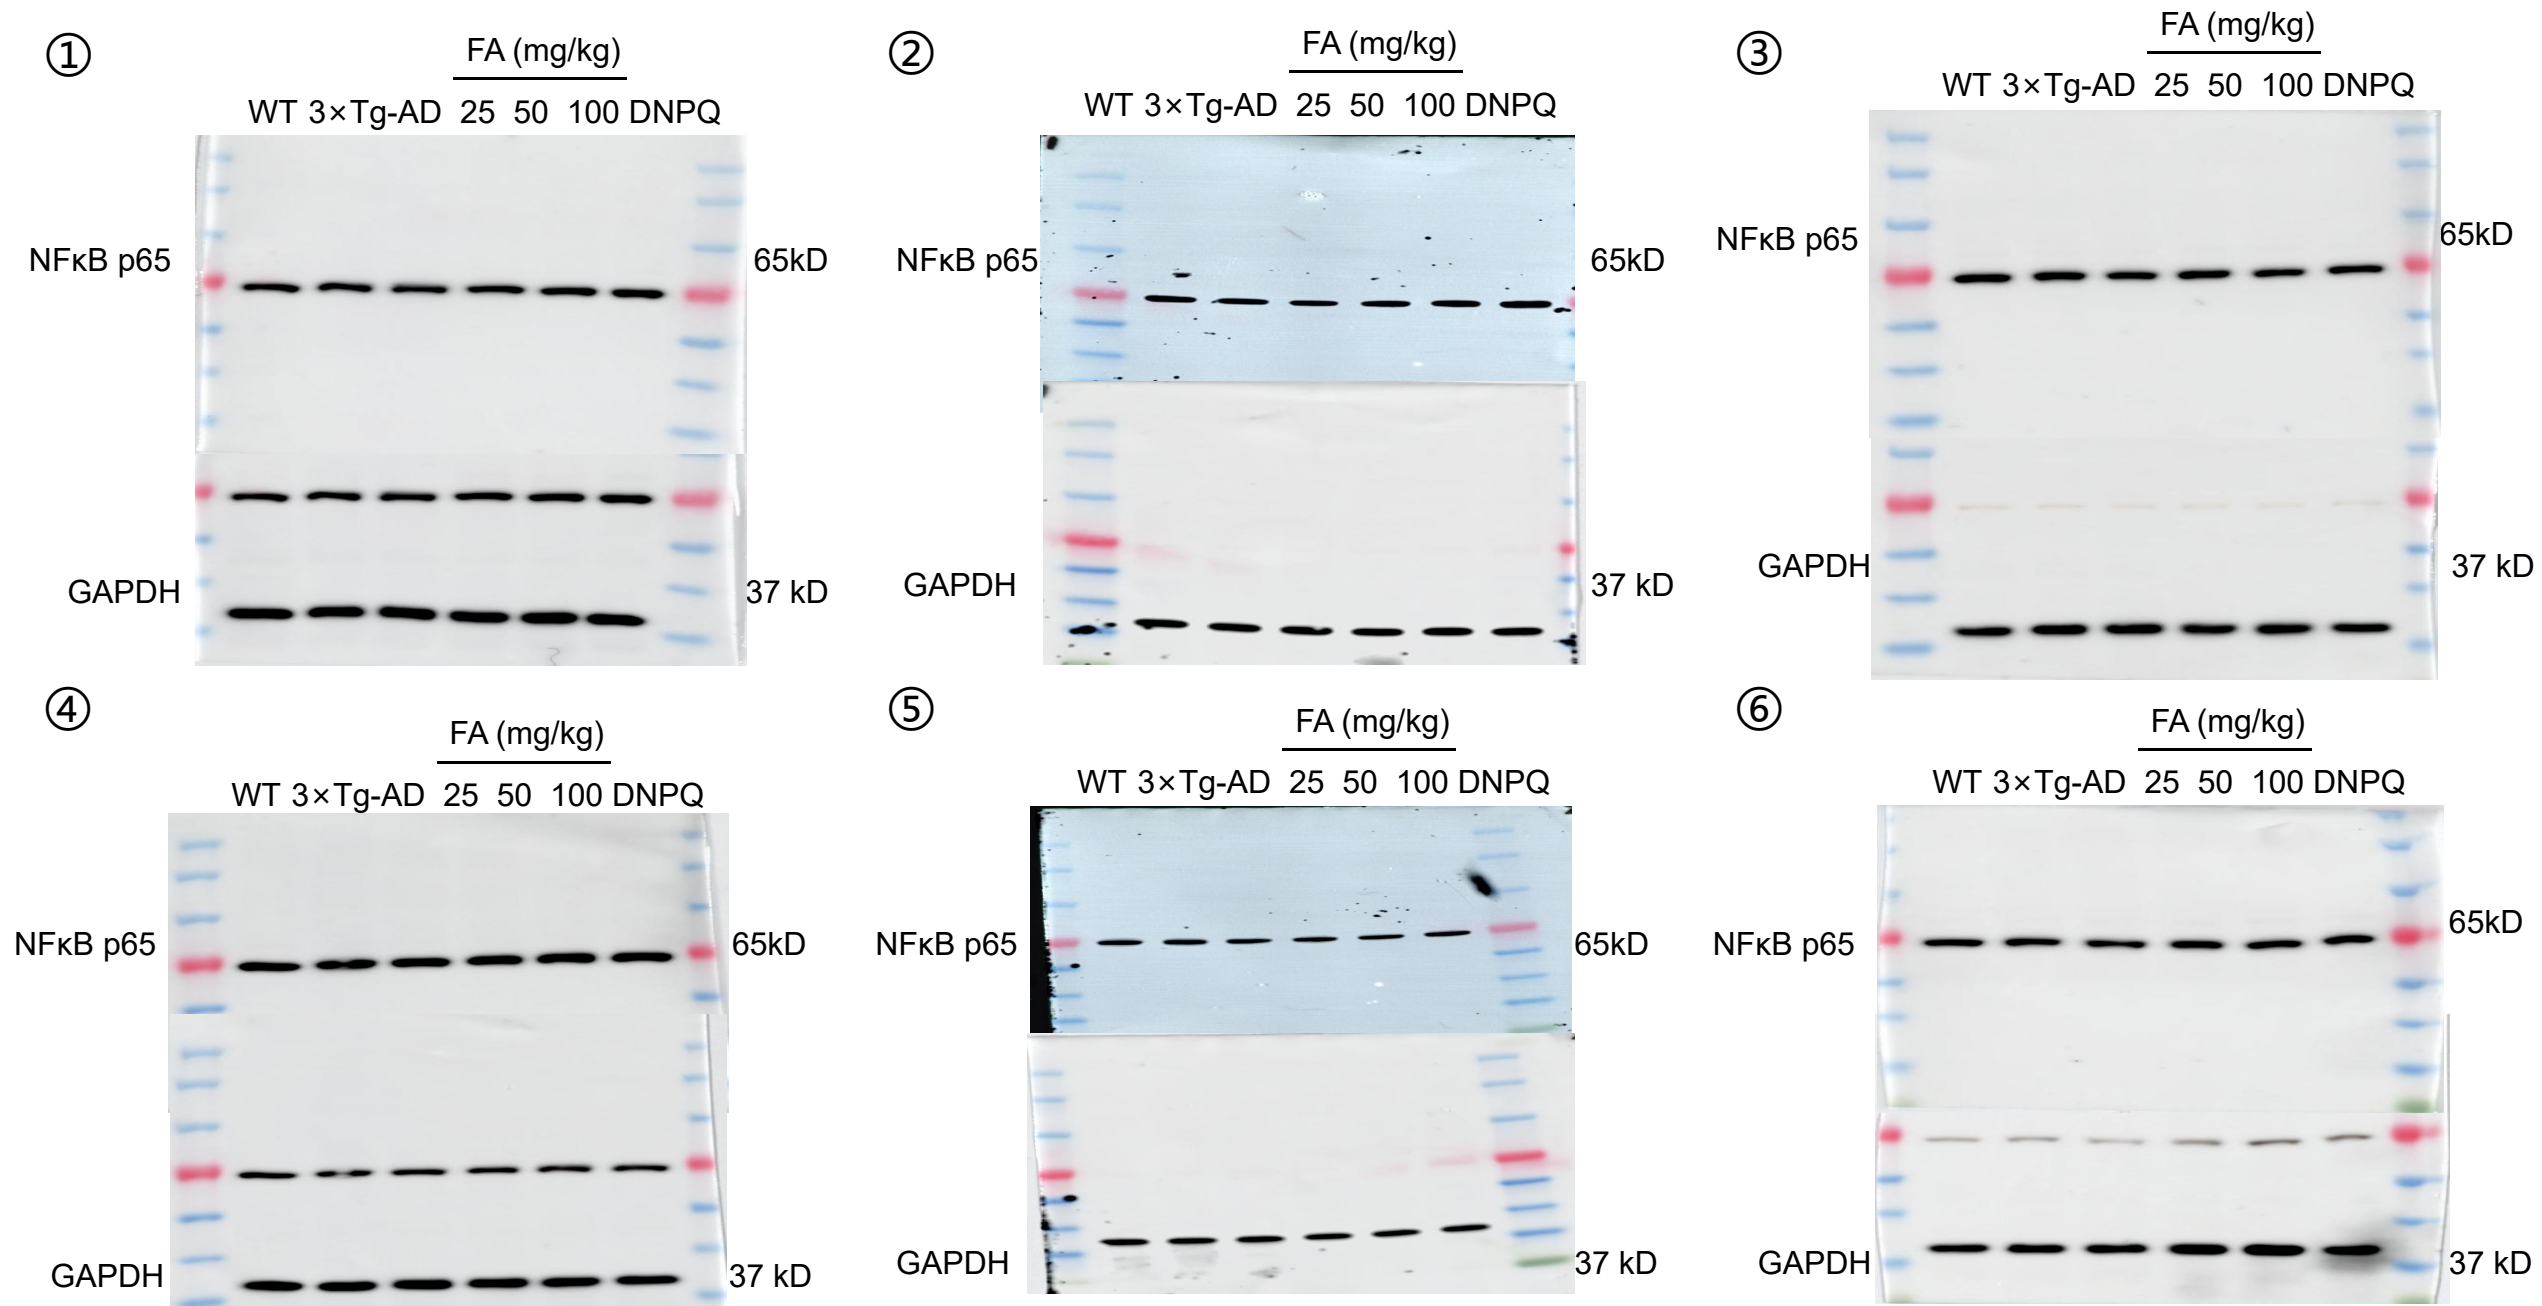

**Figure 6F.** Western blot detected the protein levels of mGluR5, iNOS, p-CaMK II and p-NF- $\kappa$ B in the hippocampus after FA treatment.

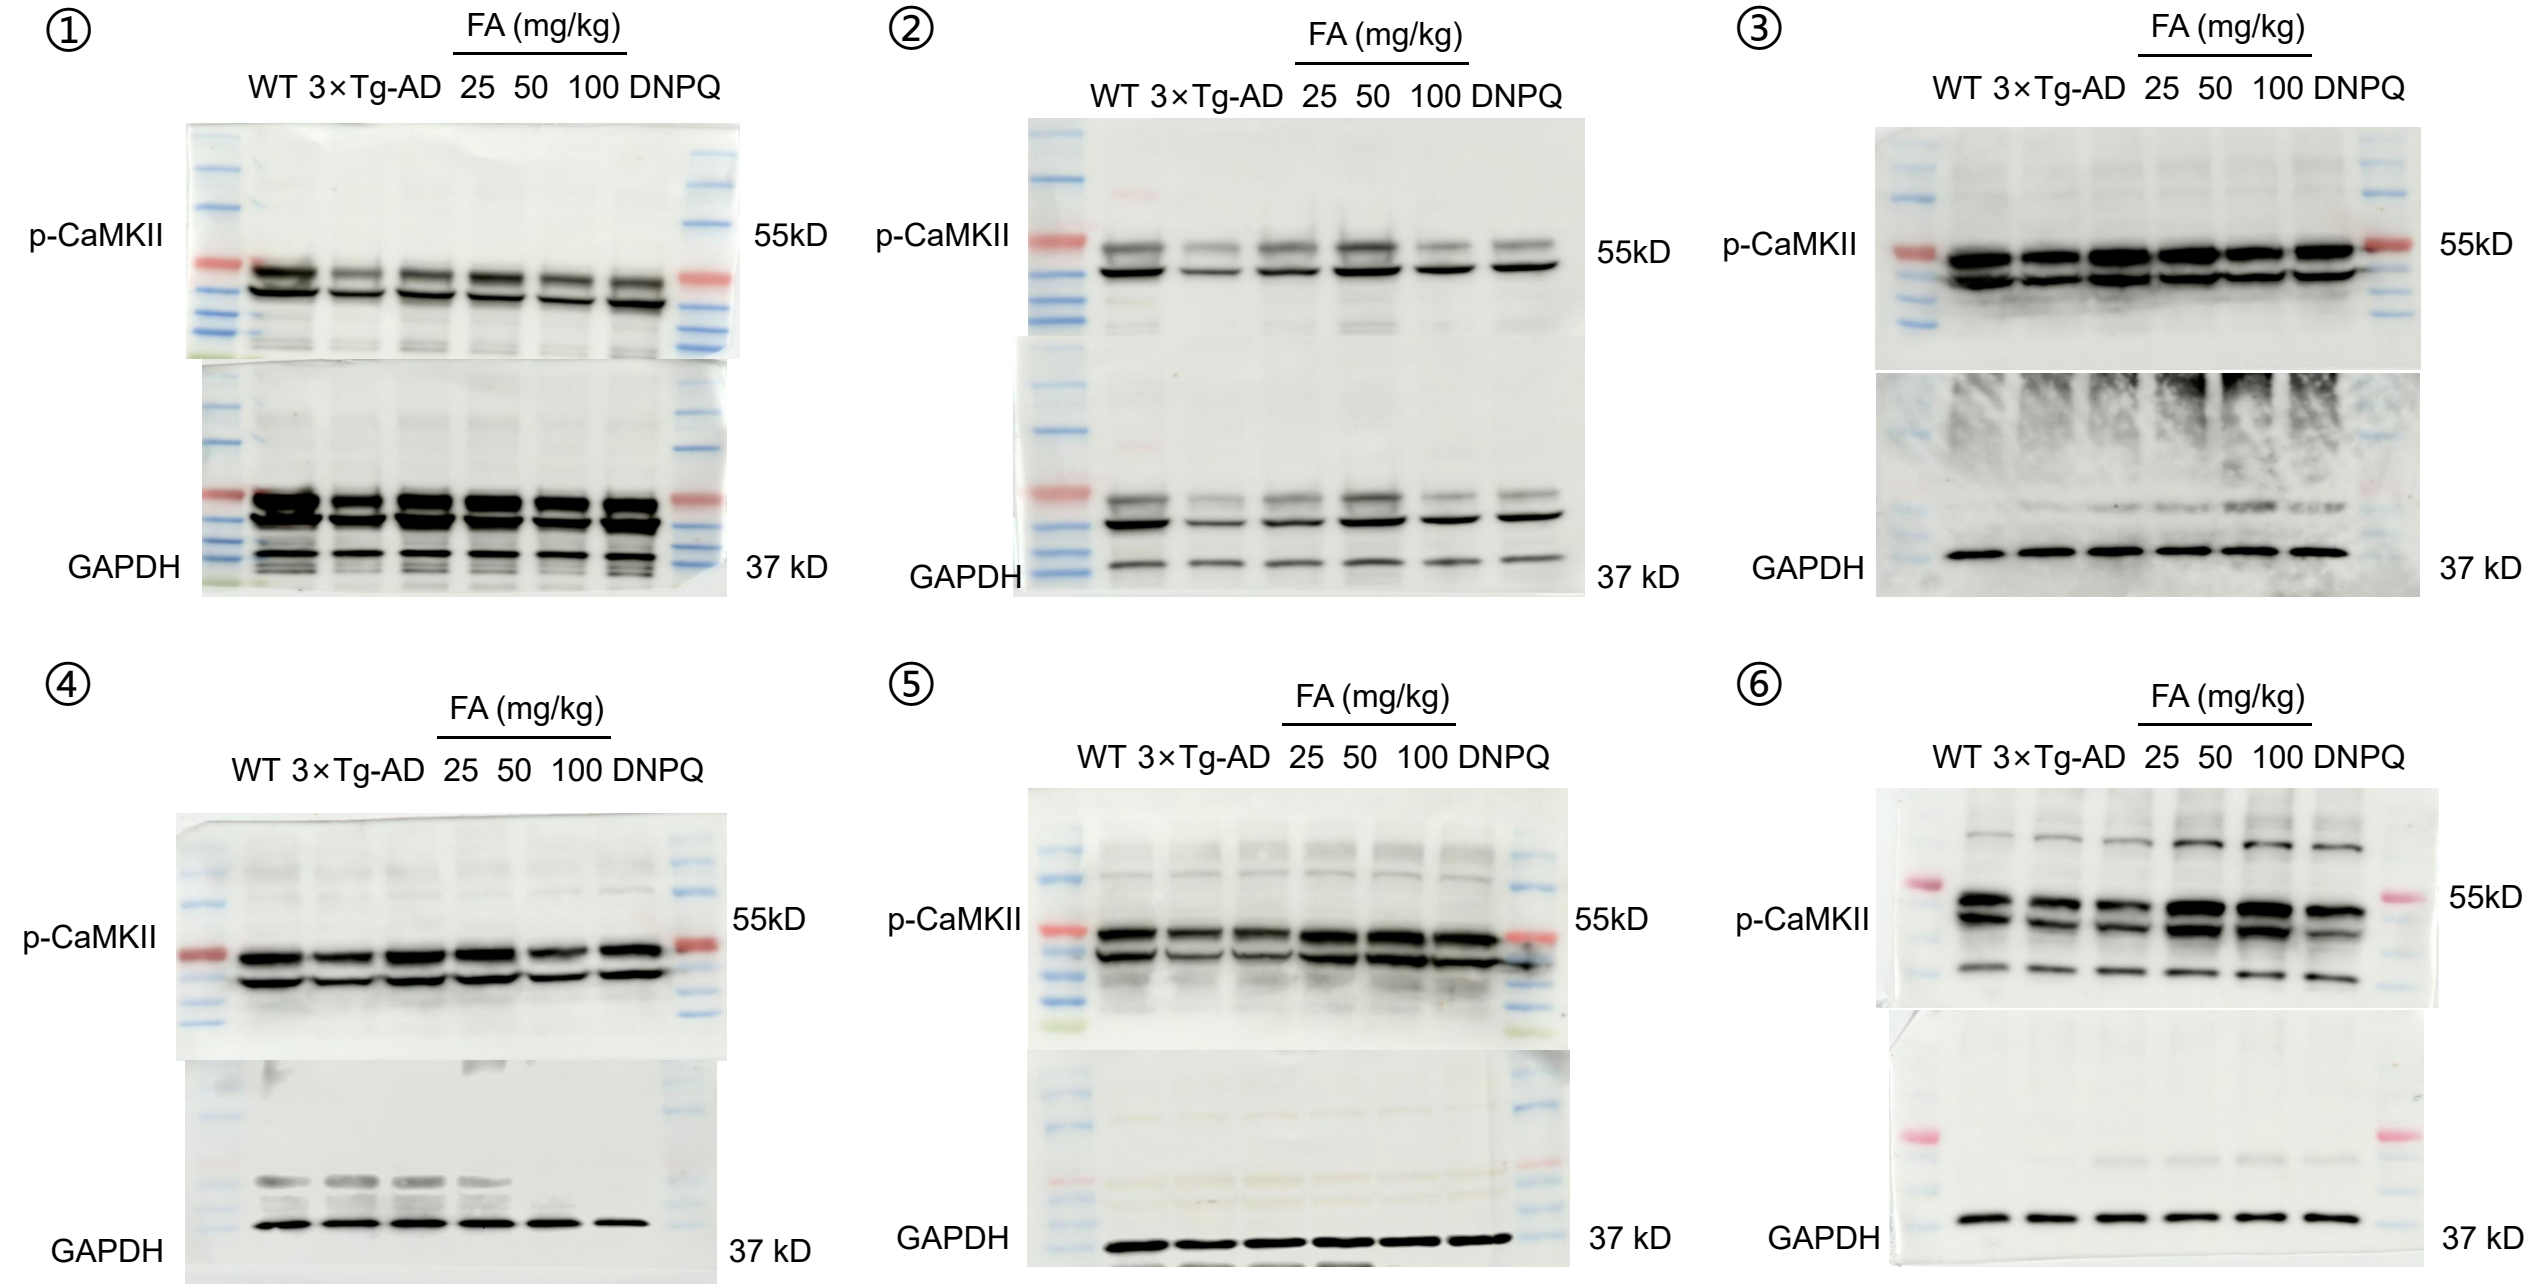

**Figure 6F.** Western blot detected the protein levels of mGluR5, iNOS, p-CaMK II and p-NF- $\kappa$ B in the hippocampus after FA treatment.

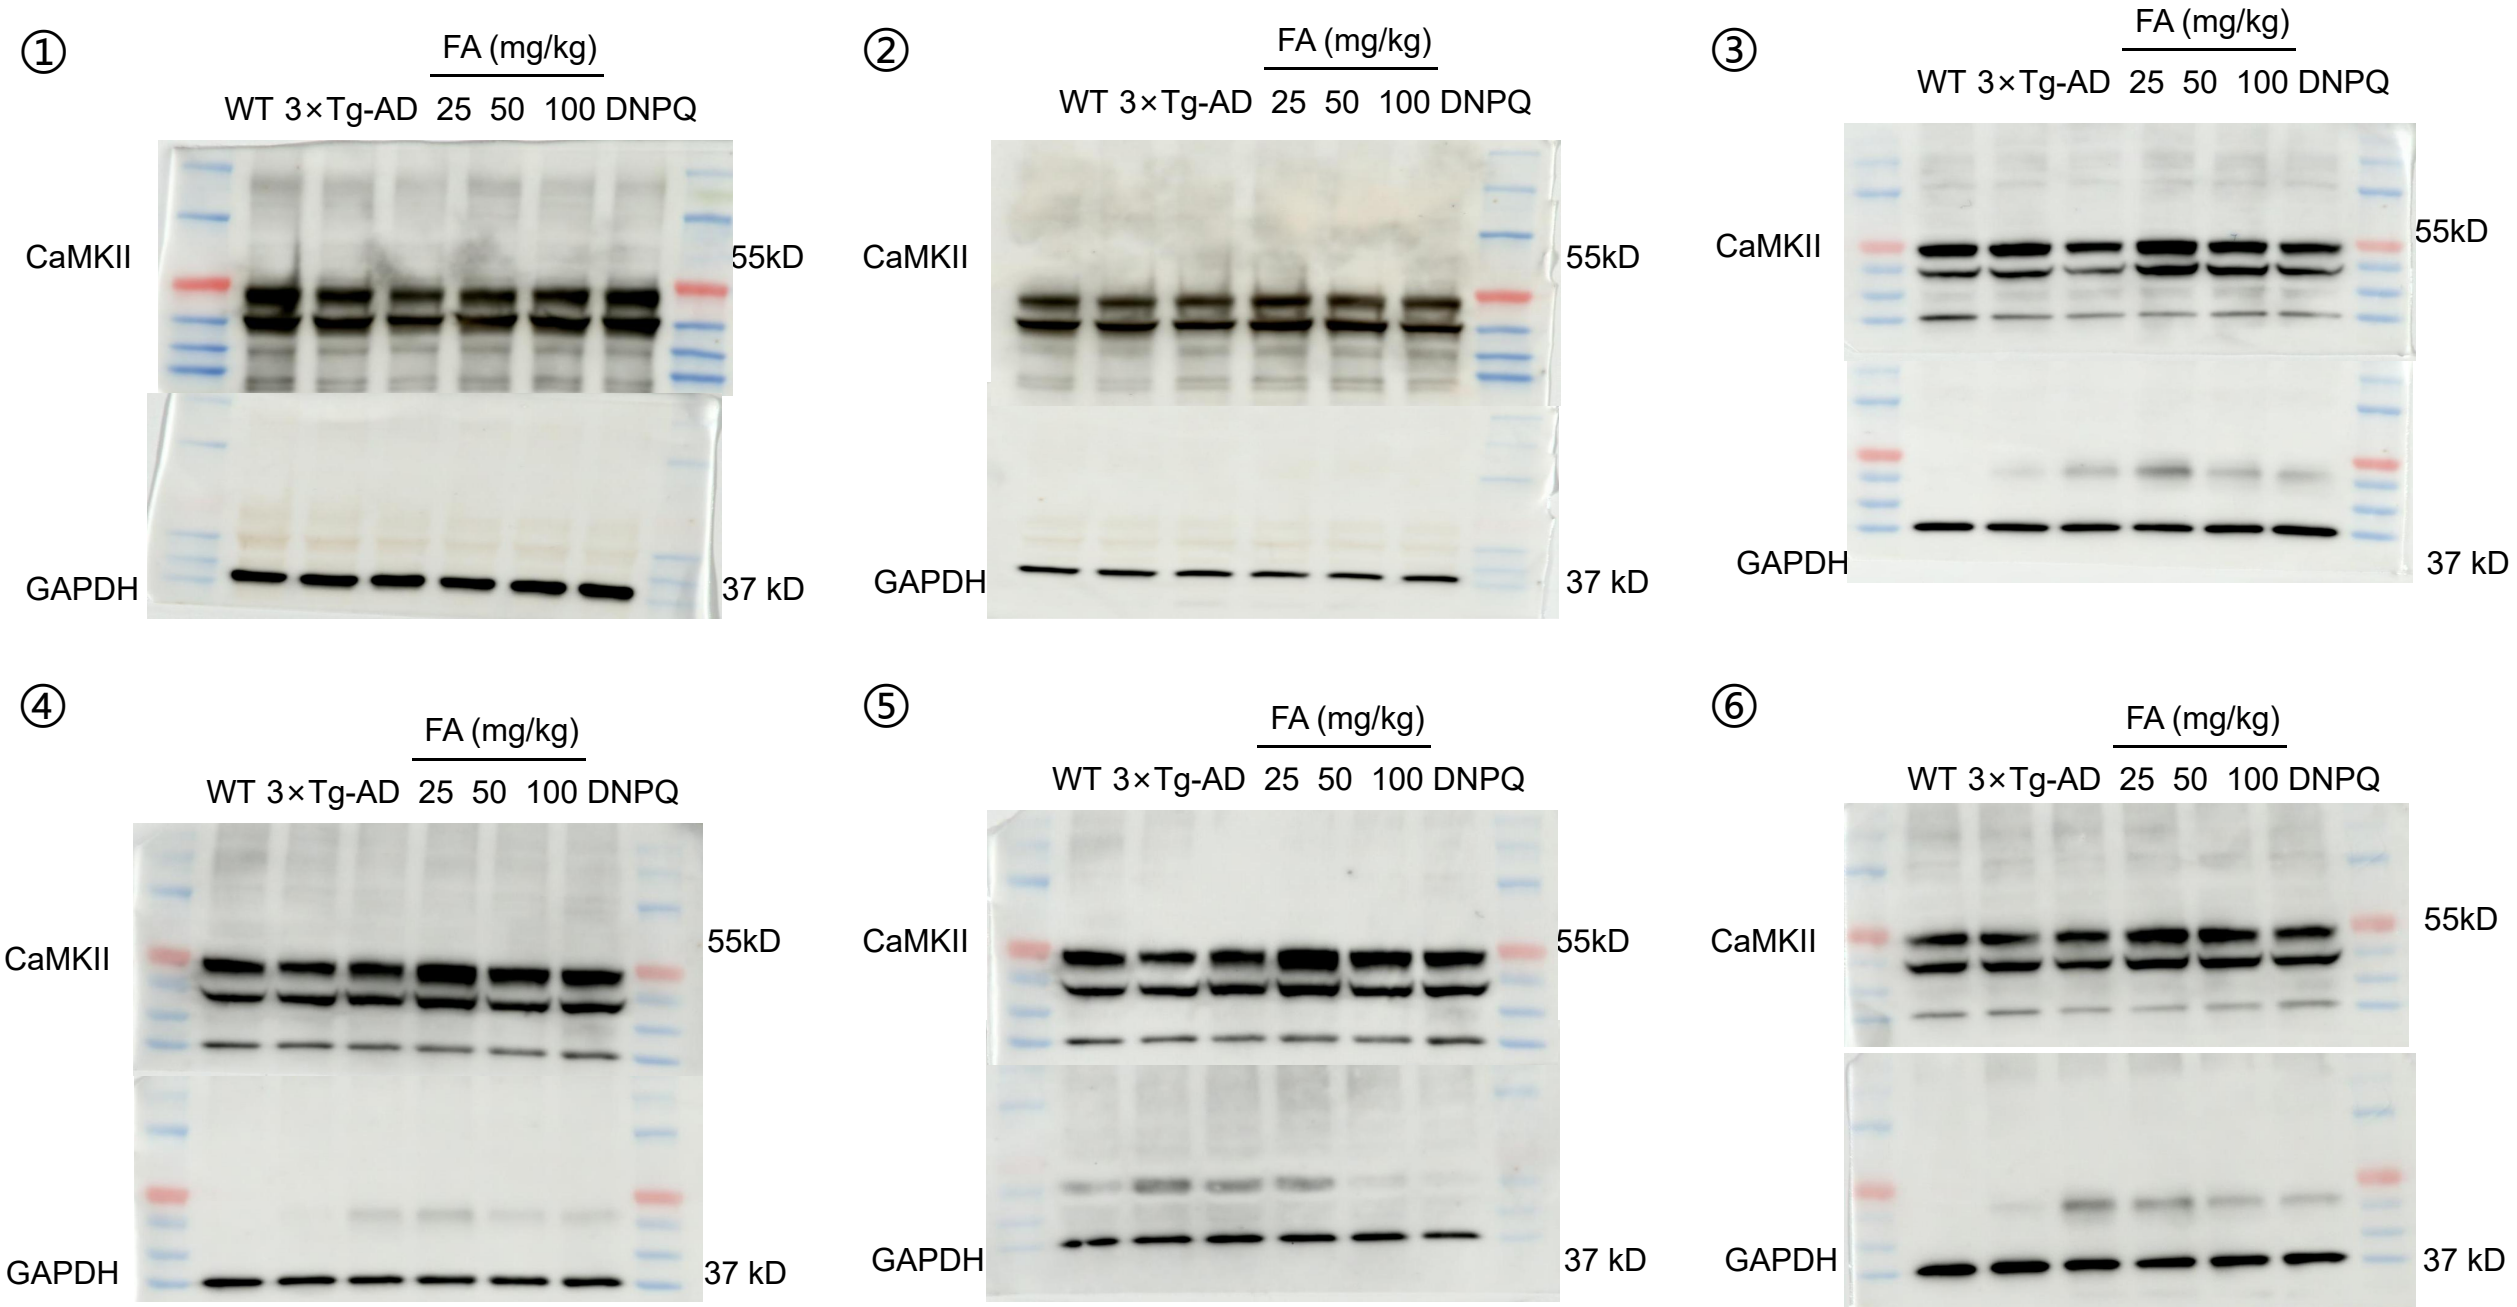

**Figure 7F.** Western blot detected the protein levels of mGluR5, iNOS, p-CaMK II and p-NF- $\kappa$ B in the BV2 cells after FA treatment.

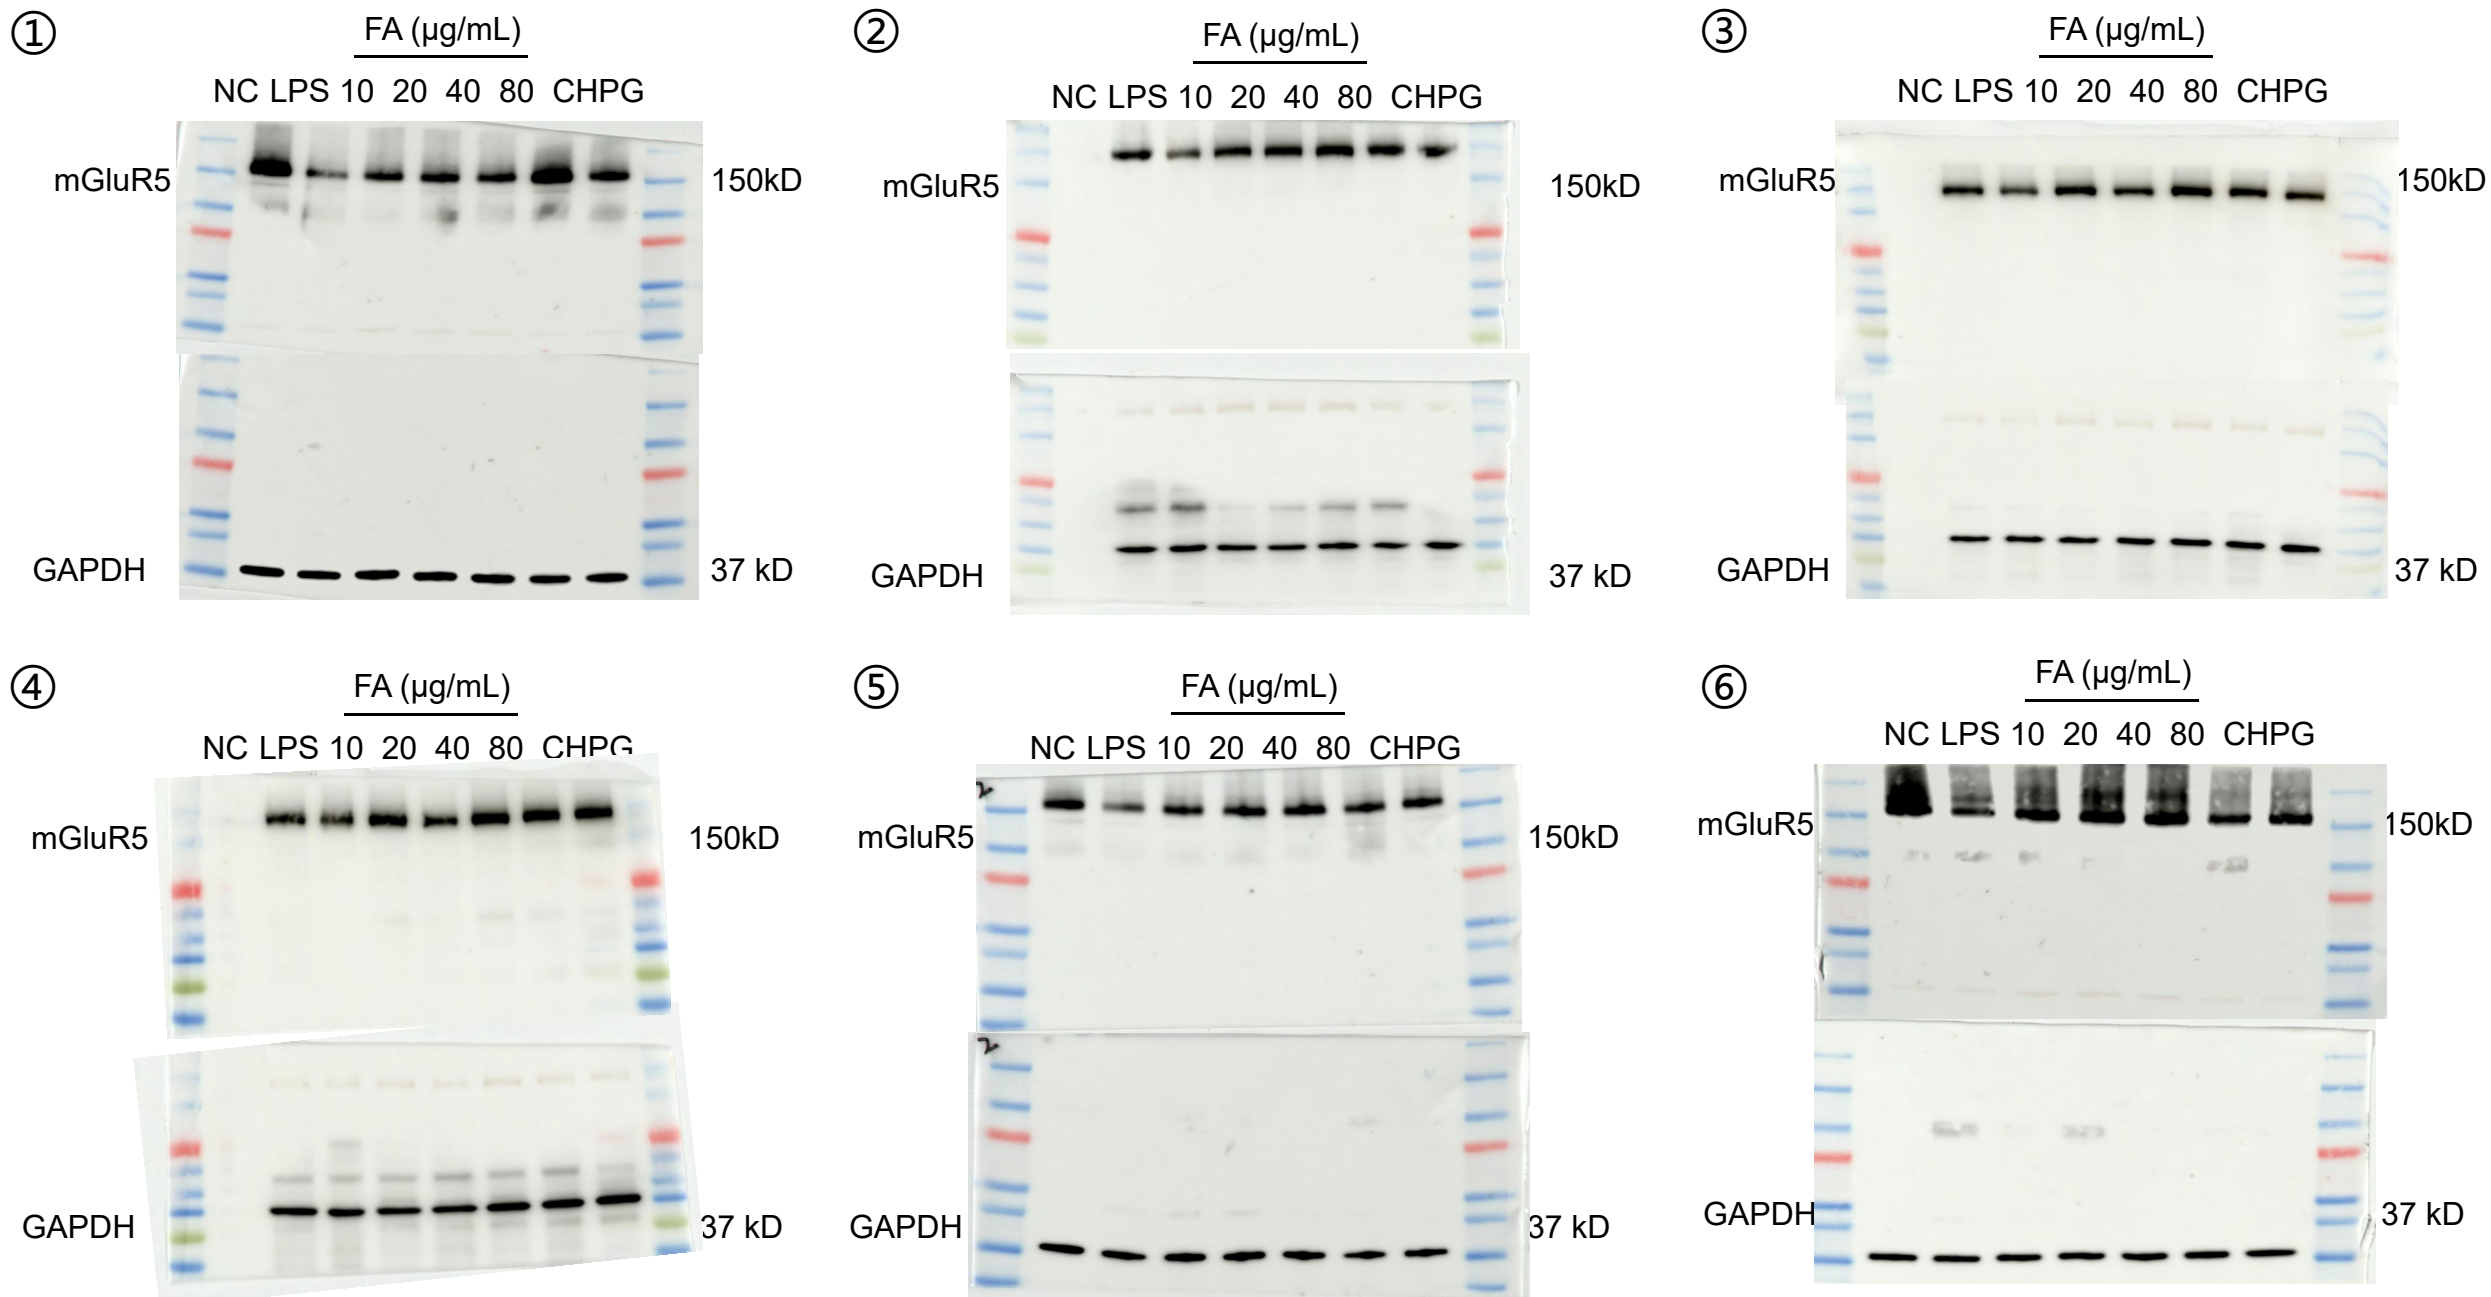

**Figure 7F.** Western blot detected the protein levels of mGluR5, iNOS, p-CaMK II and p-NF- $\kappa$ B in the BV2 cells after FA treatment.

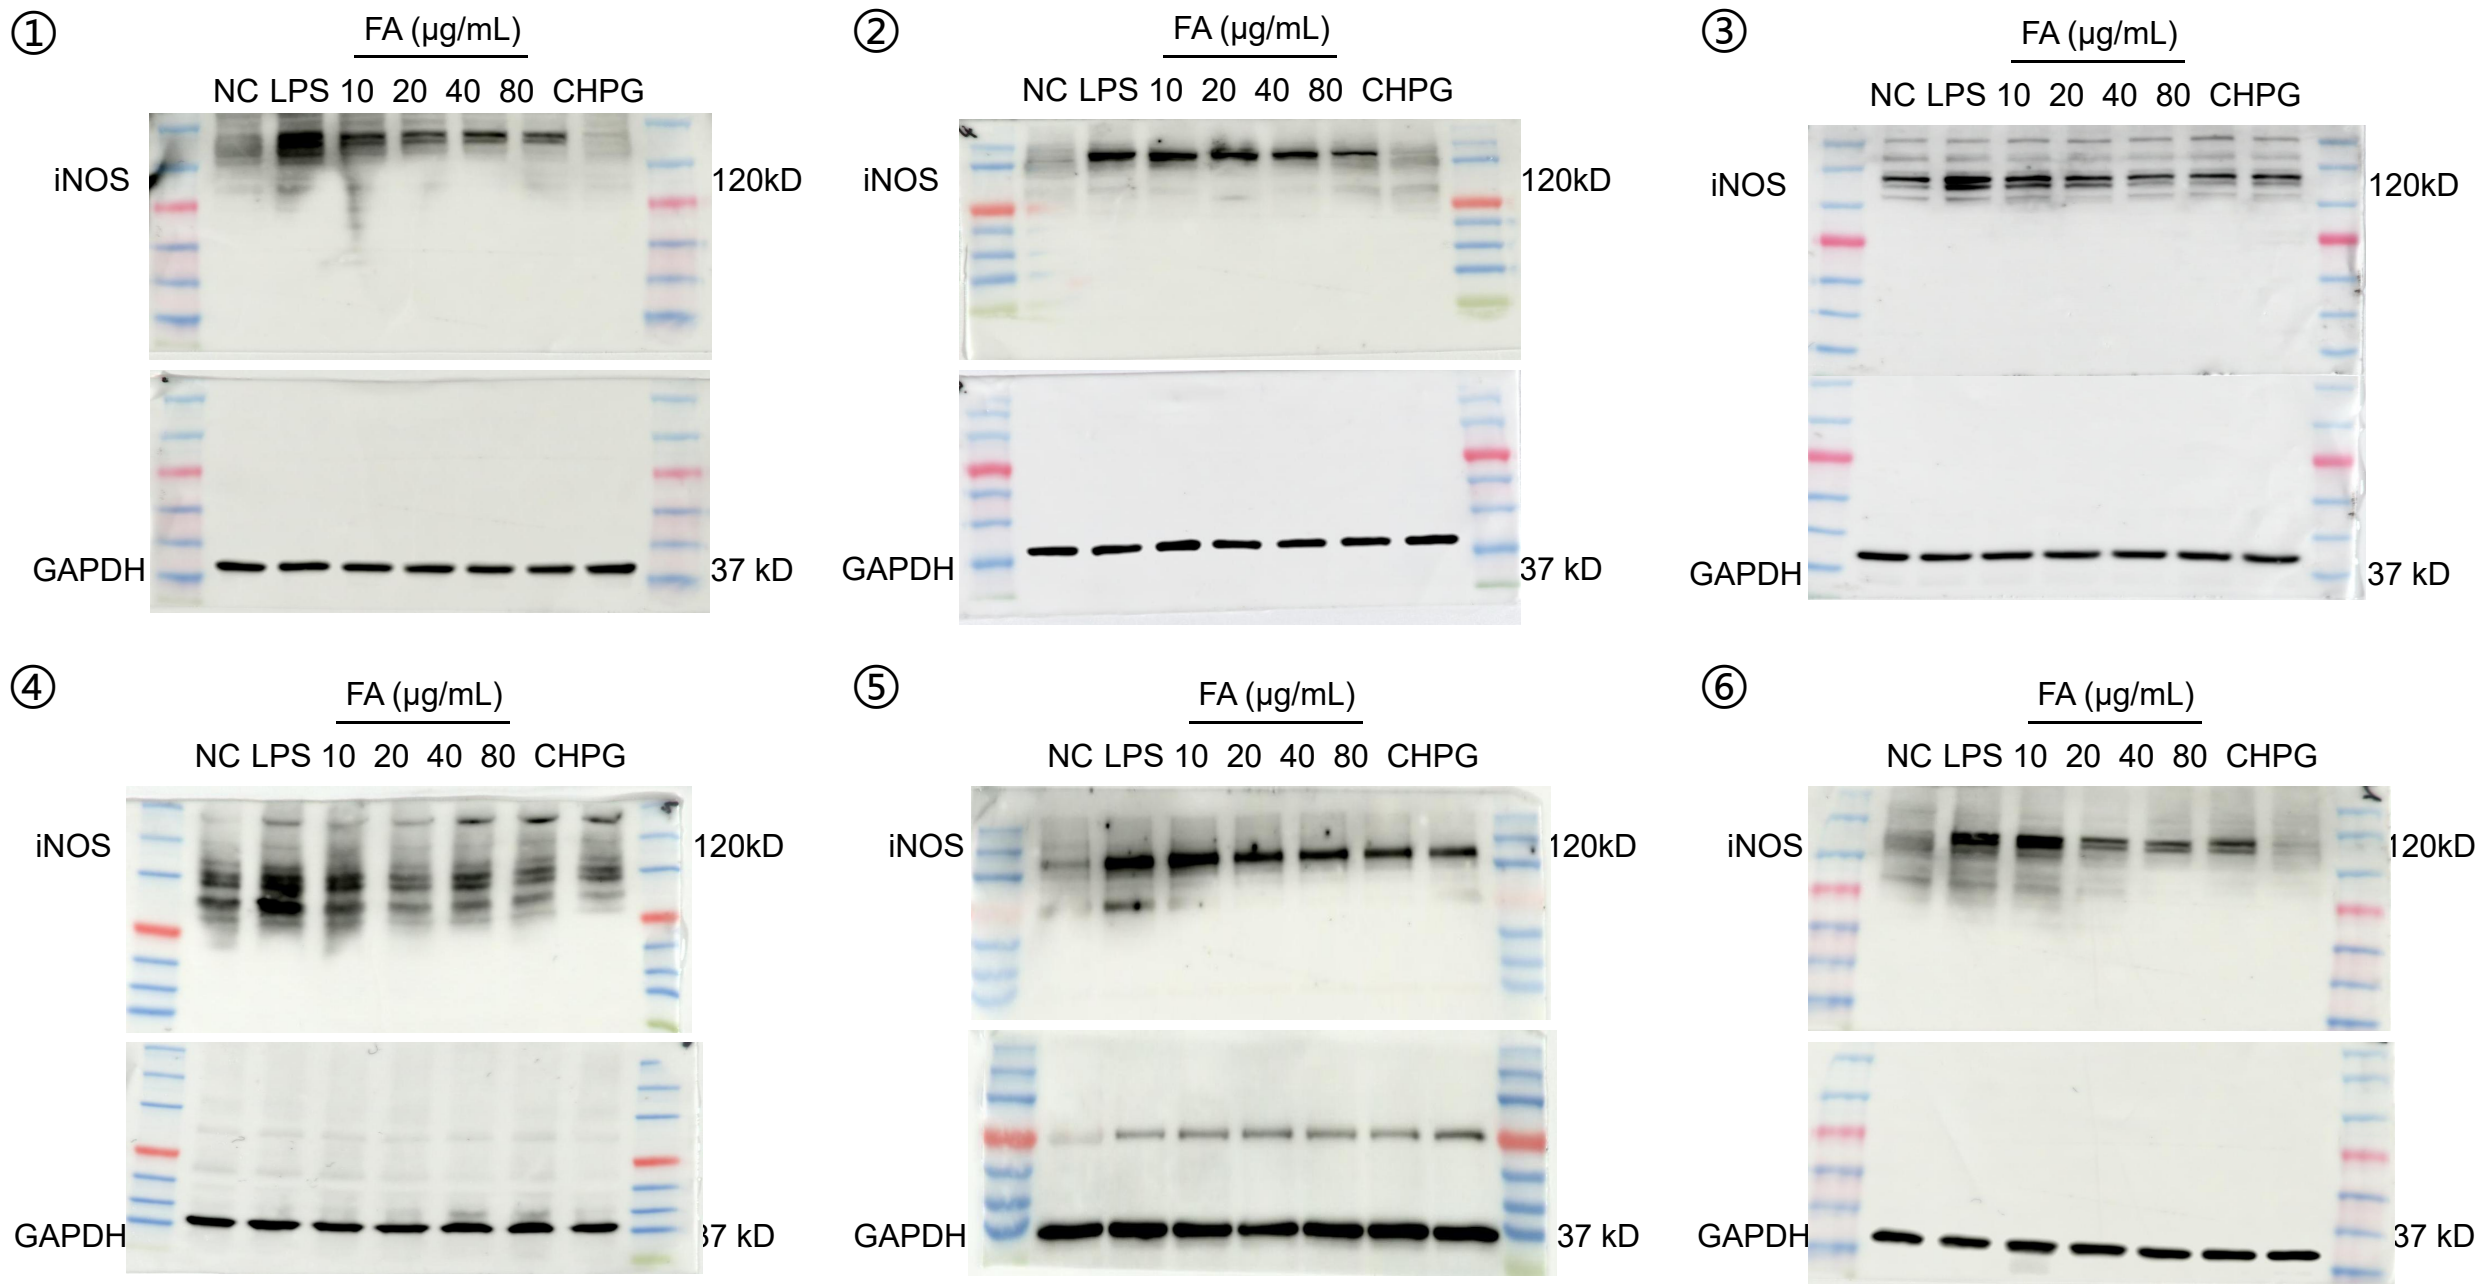

**Figure 7F.** Western blot detected the protein levels of mGluR5, iNOS, p-CaMK II and p-NF- $\kappa$ B in the BV2 cells after FA treatment.

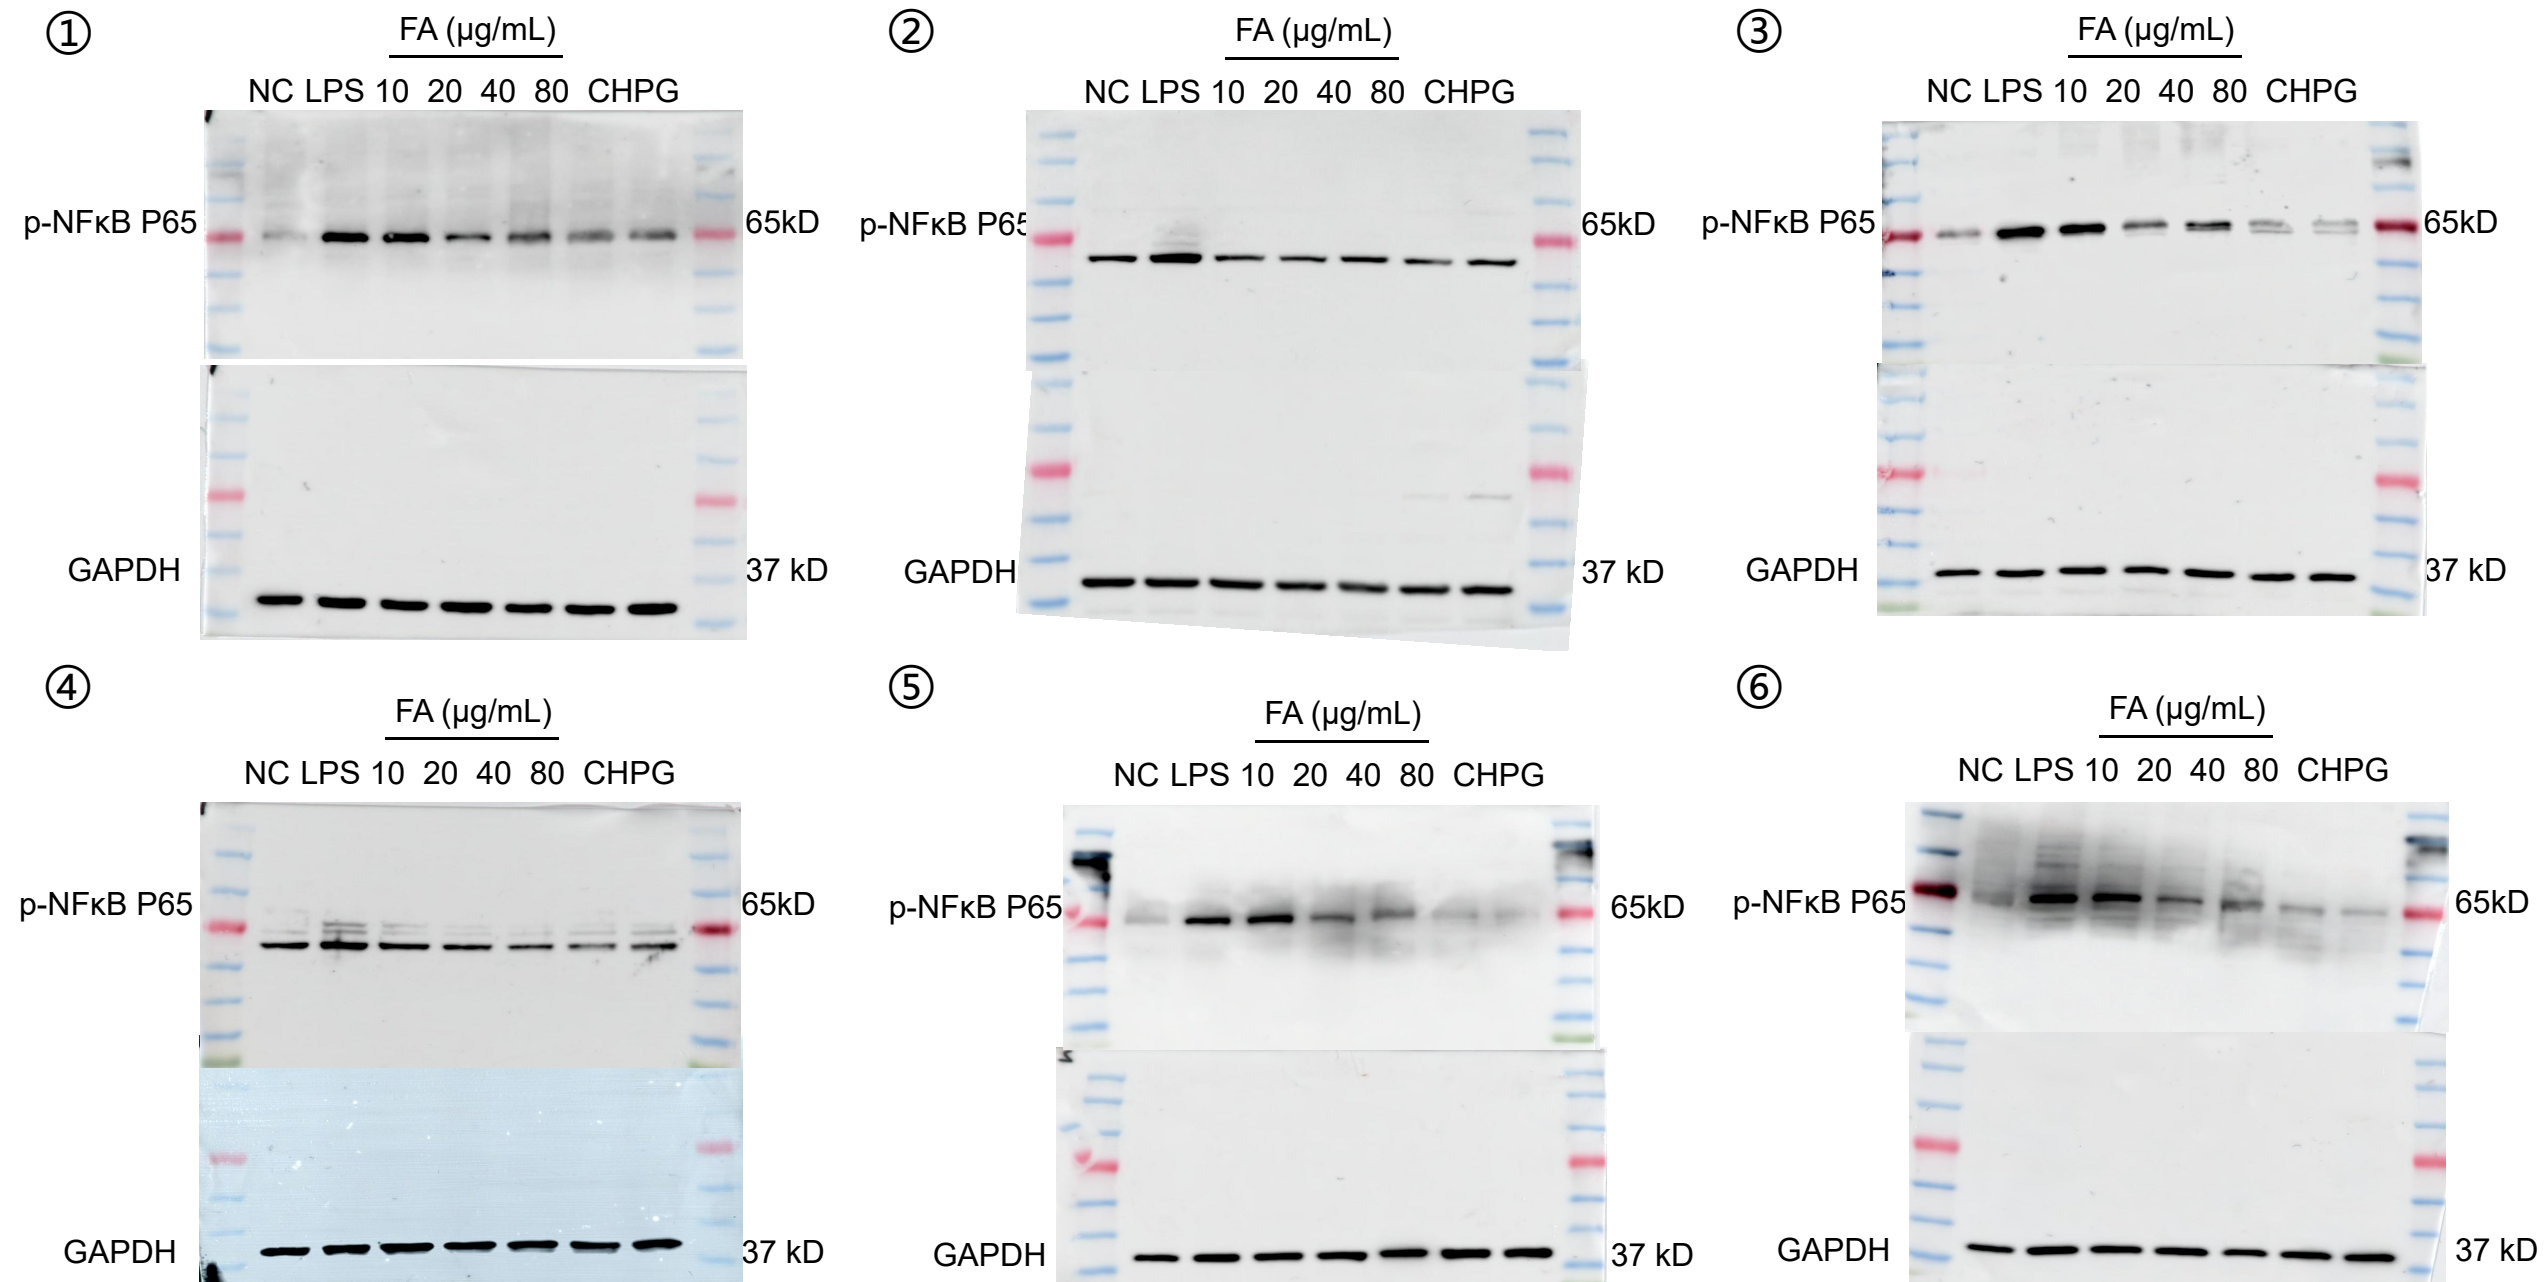

**Figure 7F.** Western blot detected the protein levels of mGluR5, iNOS, p-CaMK II and p-NF- $\kappa$ B in the BV2 cells after FA treatment.

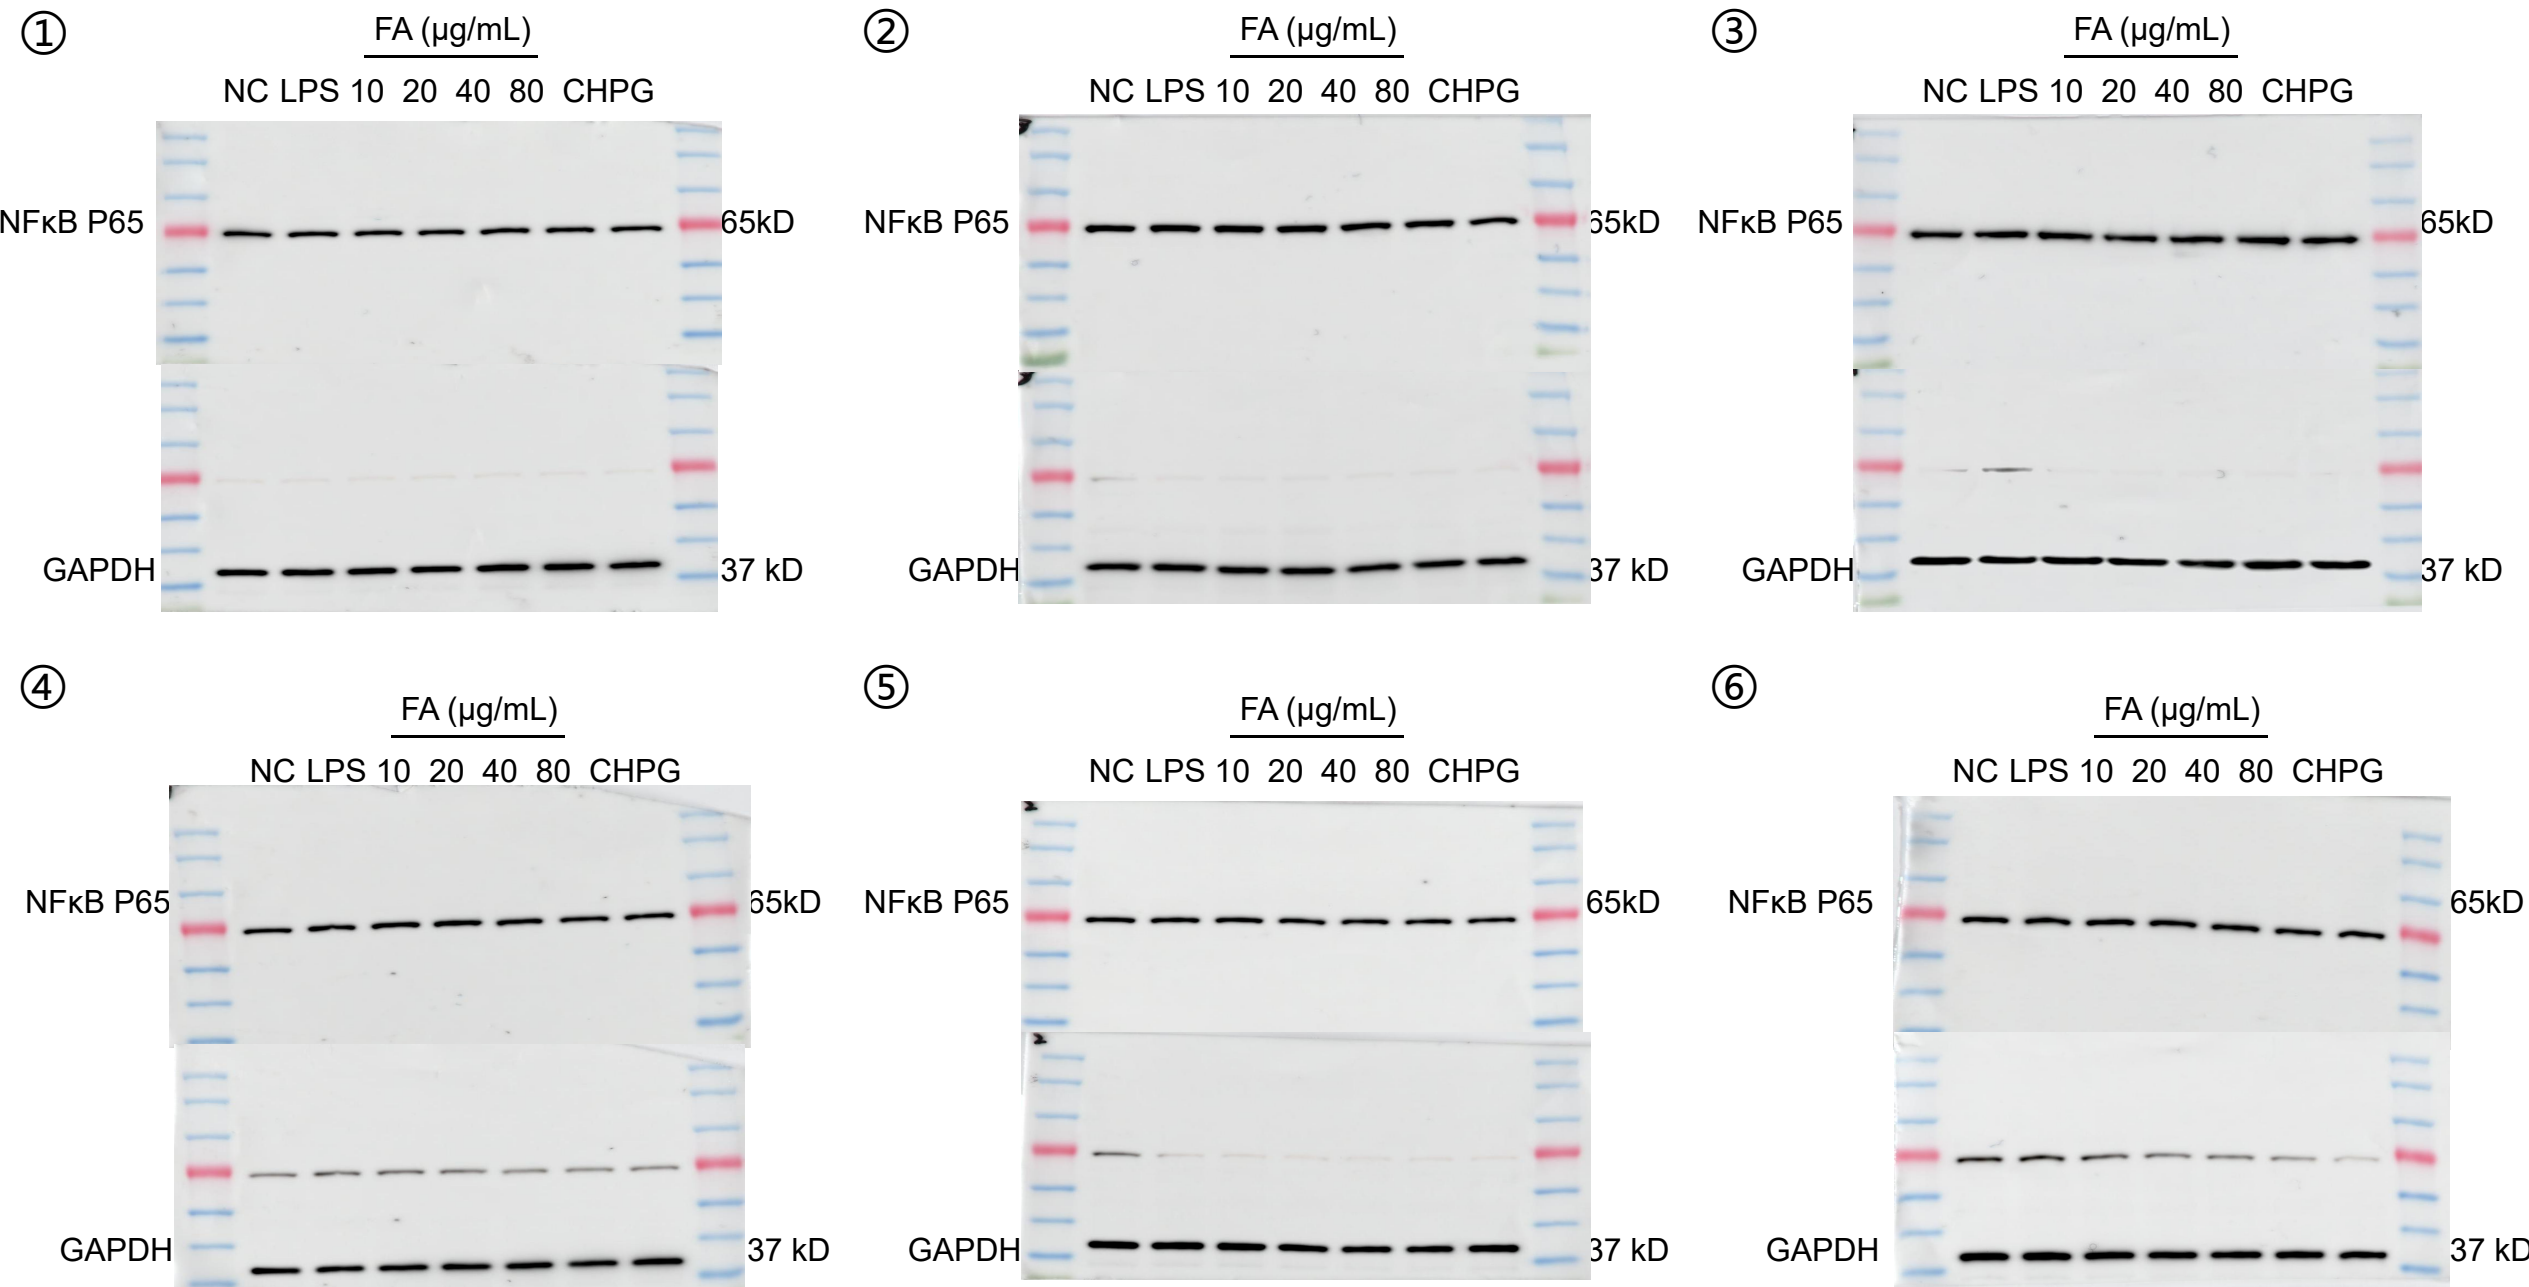

**Figure 7F.** Western blot detected the protein levels of mGluR5, iNOS, p-CaMK II and p-NF- $\kappa$ B in the BV2 cells after FA treatment.

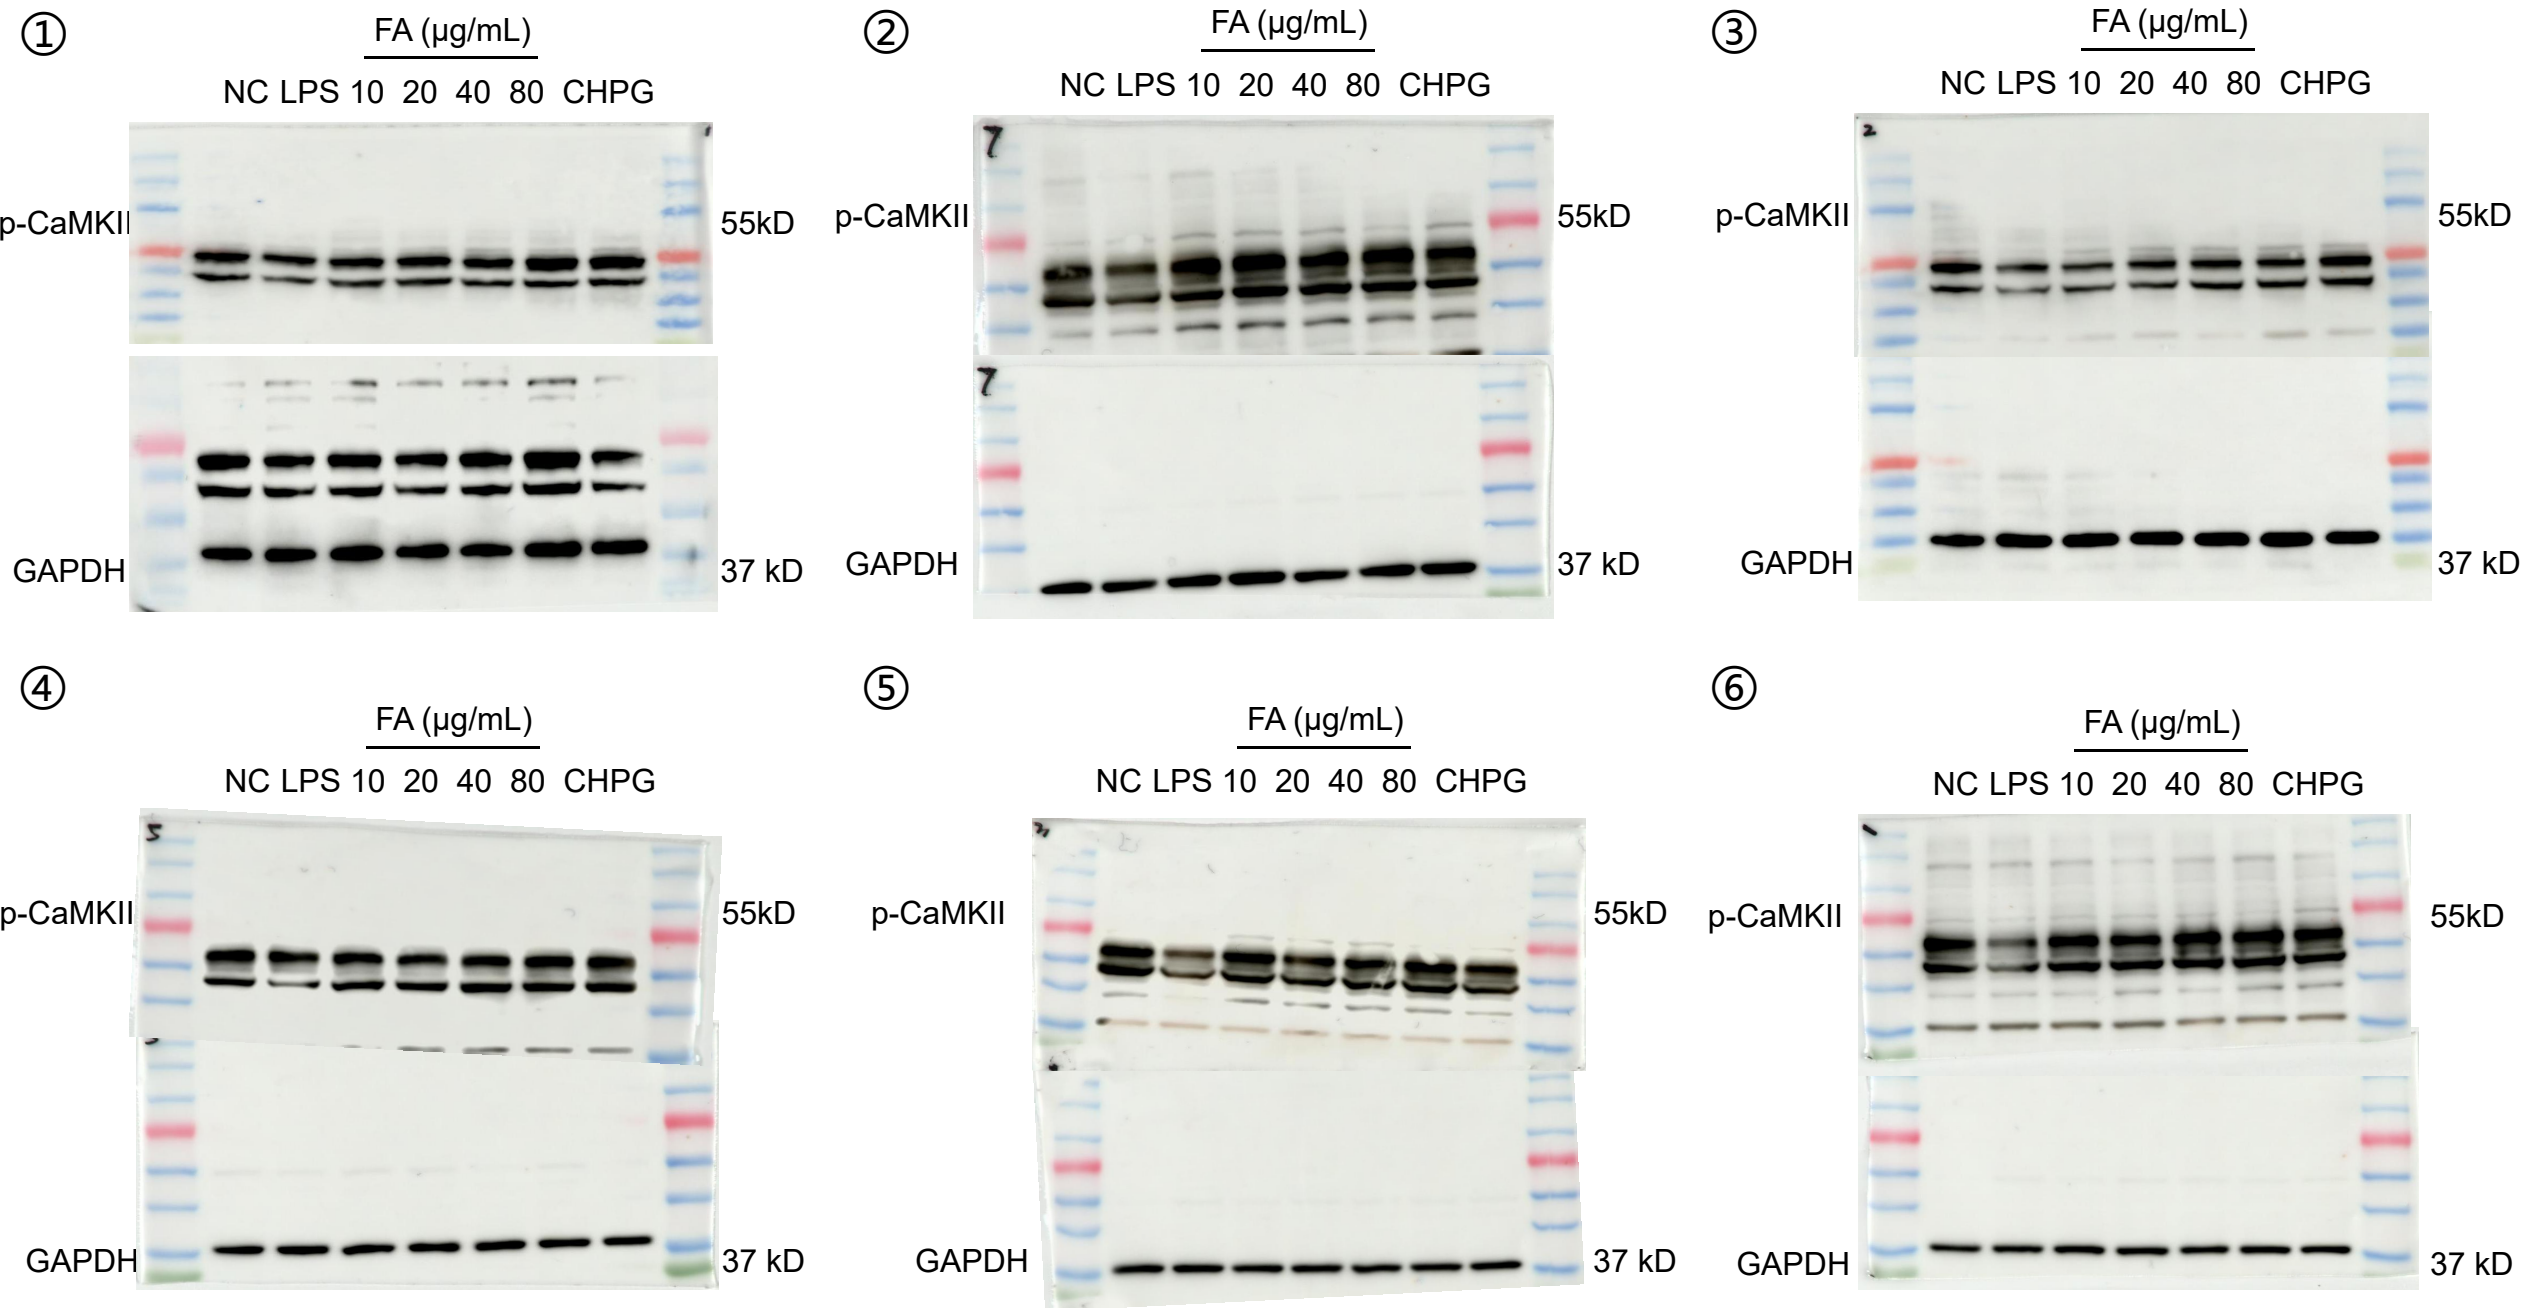

**Figure 7F.** Western blot detected the protein levels of mGluR5, iNOS, p-CaMK II and p-NF- $\kappa$ B in the BV2 cells after FA treatment.

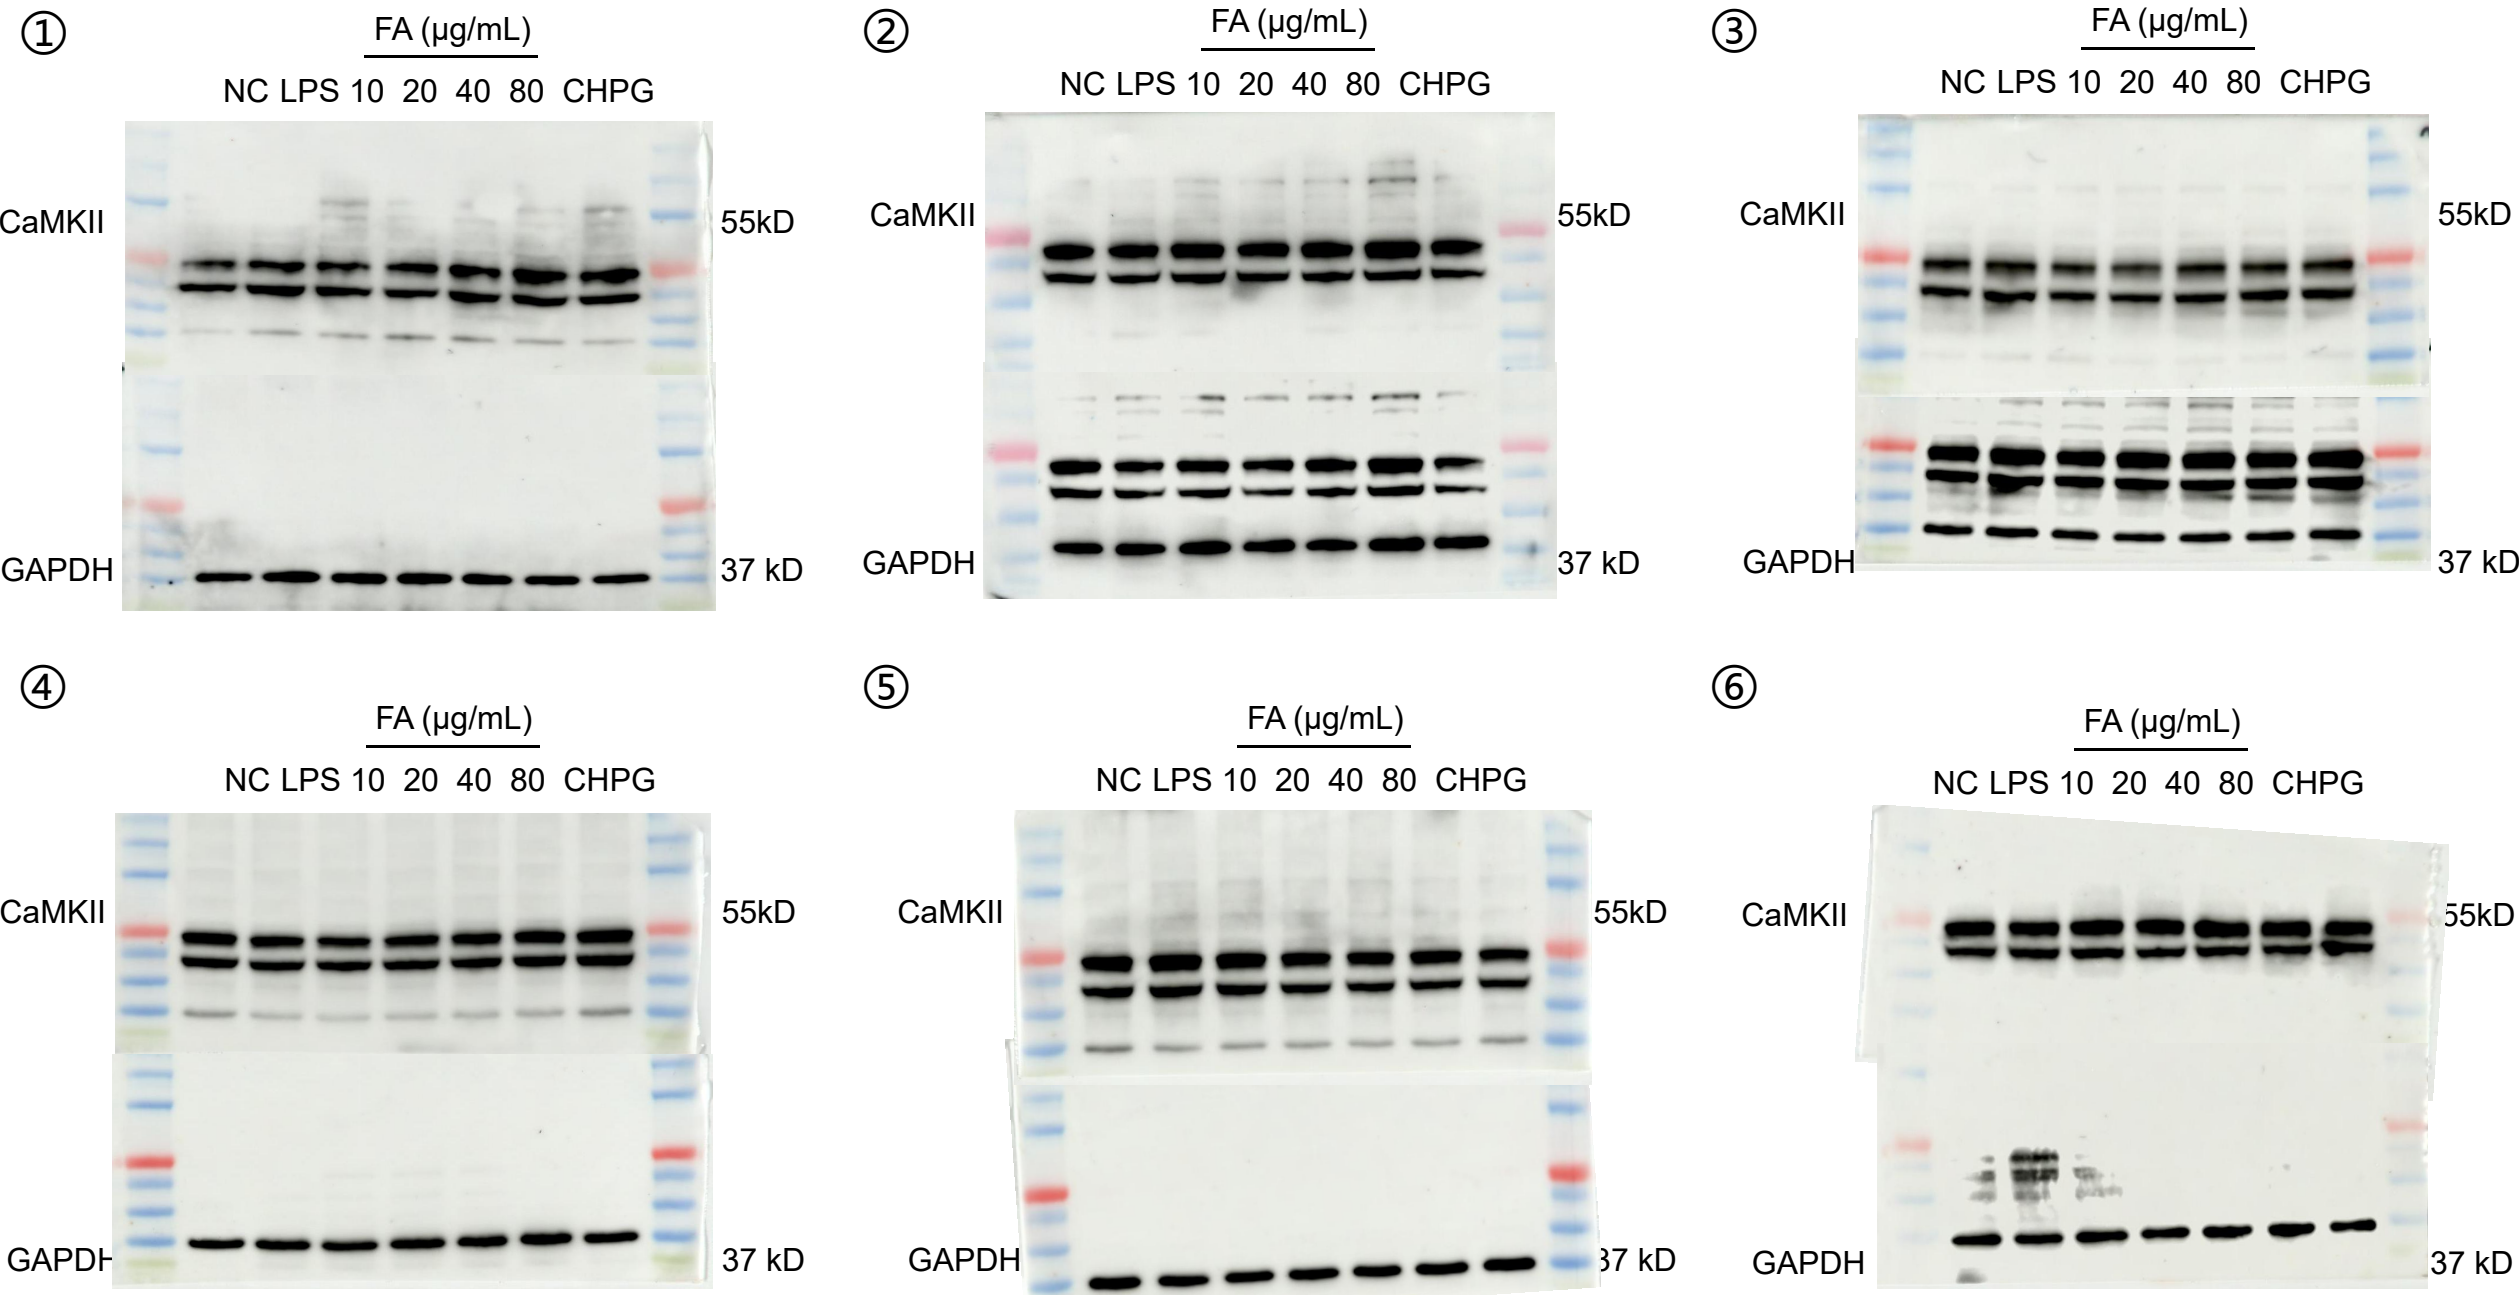

Supplement: Supplementary file 1 [file ee384cafe80d1d5969a9385a.pdf]
